# Supplementary material
Source: Royal Society of Chemistry journal article supplement (doi:10.1039/d6cp01529h)
Supplement: d6cp01529h1.zip [file achemso.pdf › achemso.pdf]

# achemso — Support for American Chemical Society journal style\*

Joseph Wright<sup>†</sup>

Released 2025-09-22

## Abstract

The `achemso` bundle provides a `LaTeX` style file following the requirements of the American Chemical Society (ACS), and a package to pass settings to the `LaTeX` style. It also includes a class which was used for submission support in the past.

All of this material is largely of historical interest and is retained for stability. For new material, the `LaTeX` style `chem-ac`s is available for bibliographies, and a short template for the ACS website is better suited to submission.

## 1 Implementation

A lot of the work done by the package is also needed by the class. Loading the package and the class makes load-order awkward. Instead, the two parts are done in one place. Sandwiching the common code are two slices of dedicated material for the class and the package. Some of this is needed “early”, before the common material, whilst the rest is “late”.

### 1.1 Early class-only code

So that there is no confusion, the base class is loaded early.

```
1 \*class
2 \ProvidesClass{achemso}
3 [2025-09-22 v3.14 Submission to ACS journals]
4 \LoadClass[12pt,letter]{article}
```

`\acs@warning` The code for a warning is created so that it works for the package too.

```
5 \newcommand*\acs@warning{\ClassWarning{achemso}}
6 \class
```

---

\*This file describes version v3.14, last revised 2025-09-22.

<sup>†</sup>E-mail: joseph@texdev.net

## 1.2 Early package-only code

The package and the class should not both be loaded, as the two use the same internal macro names. On the other hand, if the class is not in use a reminder is printed to use it if possible.

```
7 (*package)
8 \ProvidesPackage{achemso}
9 [2025-09-22 v3.14 Support for ACS journals]
10 \@ifclassloaded{achemso}{%
11   \PackageInfo{achemso}{%
12     You have already loaded the 'achemso' class:\MessageBreak
13     loading the package will abort%
14   }%
15 \endinput
16 }{%
17   \PackageInfo{achemso}{%
18     When writing a submission to an ACS journal, please\MessageBreak
19     use the achemso document class%
20   }%
21 }
```

`\acs@warning` The code for a warning is created so that it works for the class too.

```
22 \newcommand*\acs@warning{\PackageWarning{achemso}}
23 \endpackage
```

## 1.3 Common code

`\acs@ifundefined` A non-expandable test for defined macros: does not add to the hash table.

```
24 (*package | class)
25 \newcommand*\acs@ifundefined[1]{%
26   \begingroup\expandafter\expandafter\expandafter\endgroup
27   \expandafter\ifx\csname #1\endcsname\relax
28     \expandafter\@firstoftwo
29   \else
30     \expandafter\@secondoftwo
31   \fi
32 }
```

The first stage needed is to read the package options given. Although `xkeyval` was perhaps not the best choice, changing this now would be rather risky.

```
33 \RequirePackage{xkeyval}
```

`\acs@keyval@bool` A support macro for making Boolean options: the `xkeyval` version is only available in newer releases.

```
34 \newcommand*\acs@keyval@bool[2]{%
35   \acs@ifundefined{acs@#1#2}{%
36     \acs@warning{Unknown option '#2' for key #1}%
37   }{%
38     \@nameuse{acs@#1#2}%
39   }%
40 }
```

`\ifacs@abbreviations` These are all very trivial definitions: to avoid issues with older versions of `xkeyval` each definition is done directly.

```

\ifacs@articletitle
  \ifacs@biochem 41 \newif\ifacs@abbreviations
\ifacs@chaptertitle 42 \newif\ifacs@articletitle
  \ifacs@doi 43 \newif\ifacs@biochem
  \ifacs@email 44 \newif\ifacs@doi
\ifacs@hyperref 45 \newif\ifacs@chaptertitle
\ifacs@keywords 46 \newif\ifacs@email
  \ifacs@super 47 \newif\ifacs@hyperref
48 \newif\ifacs@keywords
49 \newif\ifacs@super
50 \define@key{acs}{abbreviations}[true]{%
51   \acs@keyval@bool{abbreviations}{#1}%
52 }
53 \define@key{acs}{articletitle}[true]{%
54   \acs@keyval@bool{articletitle}{#1}%
55 }
56 \define@key{acs}{biochem}[true]{%
57   \acs@keyval@bool{biochem}{#1}%
58 }
59 \define@key{acs}{doi}[true]{%
60   \acs@keyval@bool{doi}{#1}%
61 }
62 \define@key{acs}{chaptertitle}[true]{%
63   \acs@keyval@bool{chaptertitle}{#1}%
64 }
65 \define@key{acs}{email}[true]{%
66   \acs@keyval@bool{email}{#1}%
67 }
68 \define@key{acs}{hyperref}[true]{%
69   \acs@keyval@bool{hyperref}{#1}%
70 }
71 \define@key{acs}{keywords}[true]{%
72   \acs@keyval@bool{keywords}{#1}%
73 }
74 \define@key{acs}{super}[true]{%
75   \acs@keyval@bool{super}{#1}%
76 }
77 \define@key{acs}{usetitle}[true]{%
78   \acs@keyval@bool{articletitle}{#1}%
79 }

```

`\acs@journal` Trivial again: done without using `xkeyval` for the same reasons as before.

```

  \acs@layout 80 \newcommand*\acs@journal{jacsat}
\acs@manuscript 81 \newcommand*\acs@layout{traditional}
\acs@maxauthors 82 \newcommand*\acs@manuscript{article}
83 \newcommand*\acs@maxauthors{15}
84 \define@key{acs}{journal}{%
85   \def\acs@journal{#1}%
86 }
87 \define@key{acs}{layout}{%
88   \def\acs@layout{#1}%
89 }
90 \define@key{acs}{manuscript}{%

```

```

91 \def\acs@manuscript{#1}%
92 }
93 \define@key{acs}{maxauthors}{%
94 \def\acs@maxauthors{#1}%
95 }

```

`\ifacs@etal@truncate` The setup for the `etalmode` option is quite simple: just look for the appropriate macros.

```

\acs@etal@truncate
\acs@etal@truncate 96 \newif\ifacs@etal@truncate
97 \define@key{acs}{etalmode}{%
98 \acs@ifundefined{acs@etal@#1}{%
99 \acs@warning{%
100 Unknown value '#1' for\MessageBreak etalmode option%
101 }%
102 }{%
103 \@nameuse{acs@etal@#1}%
104 }%
105 }
106 \newcommand*\acs@etal@firstonly{\acs@etal@truncatefalse}
107 \newcommand*\acs@etal@truncate{\acs@etal@truncatefalse}

```

`\acs@activate@biblabel` The `biochemistry` option is an alias for `biochem`. The `biblabel` option is a choice, which is implemented using a `csname` search. The group here prevents hash table pollution, whilst the `xkeyval` method is avoided as it is more complex than it is worth!

```

108 \define@key{acs}{biochemistry}{%
109 \setkeys{acs}{biochem = #1}%
110 }
111 \define@key{acs}{biblabel}{%
112 \acs@ifundefined{acs@biblabel@#1}{%
113 \acs@warning{%
114 Unknown value '#1' for\MessageBreak biblabel option%
115 }%
116 }{%
117 \acs@activate@biblabel{\@nameuse{acs@biblabel@#1}}%
118 }%
119 }
120 \newcommand*\acs@activate@biblabel{}
121 \class
122 \let\acs@activate@biblabel\AtEndOfClass
123 \AtEndOfClass{\let\acs@activate@biblabel\@firstofone}
124 \endclass
125 \package
126 \let\acs@activate@biblabel\AtEndOfPackage
127 \AtEndOfPackage{\let\acs@activate@biblabel\@firstofone}
128 \endpackage

```

`\acs@biblabel@brackets` The macros to implement the idea above for biblabels.

```

\acs@biblabel@fullstop 129 \newcommand*\acs@biblabel@brackets{\def\bibnumfmt##1{##1}}
\acs@biblabel@period 130 \newcommand*\acs@biblabel@fullstop{\def\bibnumfmt##1{##1.}}
\acs@biblabel@plain 131 \newcommand*\acs@biblabel@period{\def\bibnumfmt##1{##1.}}
132 \newcommand*\acs@biblabel@plain{\def\bibnumfmt##1{##1}}

```

Set up some defaults.

```

133 \setkeys{acs}{
134   email = true,
135   super = true
136 }

```

Loading some other packages depends on the options chosen, so they are processed now.

```
137 \ProcessOptionsX* <acs>
```

`\acs@manuscript@communication` For text comparisons.

```

\acs@manuscript@letter 138 \newcommand*\acs@manuscript@communication{communication}
\acs@manuscript@note 139 \newcommand*\acs@manuscript@letter{letter}
\acs@manuscript@review 140 \newcommand*\acs@manuscript@note{note}
\acs@manuscript@suppinfo 141 \newcommand*\acs@manuscript@review{review}
142 \newcommand*\acs@manuscript@suppinfo{suppinfo}

```

`\acs@niib@create` To avoid needing to load the `notes2bib` package, especially as the plan is to move that package to L<sup>A</sup>T<sub>E</sub>X<sub>3</sub> internal syntax, `achemso` provides a minimal version here. The first step is to create macros which will need a guard against `notes2bib` already having been loaded. To allow the package and class to behave differently these are actually applied later.

```

\acs@niib@create 143 \newcommand*\acs@niib@create{%
  bibnote 144 \namedef{ver@notes2bib.sty}{%
    \thebibnote 145   2009/04/20 v1.6a Integrating notes into the bibliography (achemso
    \bibnote 146   version)
    \bibnotemark 147   }%
    148   \@ifundefined{c@bibnote}{\newcounter{bibnote}}{}
    149   \def\thebibnote{%
    150     Note-\the\value{bibnote}%
    151   }%
    152   \DeclareRobustCommand*\bibnote[1][\thebibnote]{%
    153     \stepcounter{bibnote}%
    154     \def\acs@niib@after@text{\cite{##1}}%
    155     \acs@niib@text{##1}%
    156   }%
    157   \DeclareRobustCommand*\bibnotemark[1][\thebibnote]{%
    158     \stepcounter{bibnote}%
    159     \cite{##1}%
    160   }%
    161   \DeclareRobustCommand*\bibnotetext[1][\thebibnote]{%
    162     \let\acs@niib@after@text\relax
    163     \acs@niib@text{##1}%
    164   }%
    165   \newcommand*\printbibnotes{%
    166     \ifnum\the\value{bibnote}>\z@ \relax
    167     \nocite{achemso-control}%
    168     \acs@bibliography{acs-\jobname}%
    169     \fi
    170   }%
    171 }

```

`\acs@niib@after@text` After the text.

```
172 \newcommand*\acs@niib@after@text{}
```

`\acs@niib@text` The `\acs@niib@text` macro is the outer part of the writing system. It does not absorb the text of note, as without  $\epsilon$ -TeX this is bad news. The same file is used for notes and the control entry for the bibliography style.

```

173 \newcommand*\acs@niib@text{%
174   \@bsphack
175   \if@filesw
176     \expandafter\acs@niib@write
177   \else
178     \expandafter\acs@niib@no@write
179   \fi
180 }

```

`\acs@niib@write` Writing verbatim without  $\epsilon$ -TeX.

```

\acs@niib@write@aux@i 181 \newcommand*\acs@niib@write[1]{%
\acs@niib@write@aux@ii 182   \begingroup
183     \let\do\@makeother
184     \dospecials
185     \catcode'\{ 1\relax
186     \catcode'\} 2\relax
187     \acs@niib@write@aux@i{#1}%
188 }
189 \newcommand*\acs@niib@write@aux@ii[1]{%
190   \long\def\@tempa##1{%
191     \def\@tempa{##1}%
192     \@onelevel@sanitize\@tempa
193     \expandafter\endgroup
194     \expandafter\def\expandafter\@tempa\expandafter{\@tempa}%
195     \acs@niib@write@aux@ii{#1}%
196   }%
197   \catcode'\^^M 10\relax
198   \@tempa
199 }
200 \newcommand*\acs@niib@write@aux@iii[1]{%
201   \immediate\write\acs@bib@file{%
202     @Misc\string{#1,^^J%
203     \space\space note = \string{\@tempa\string},^^J%
204     \string}^^J%
205   }%
206   \@esphack
207   \acs@niib@after@text
208 }

```

`\acs@niib@no@write` If no files are to be written, a bit of tidying up.

```

209 \newcommand\acs@niib@no@write[2]{%
210   \@esphack
211   \acs@niib@after@text
212 }

```

`\nmv@natbib@detect` The functionality of notes2bib is combined with the standard `\cite` macro, to give automatic note-like data in the bibliography.

```

\acs@autonote 213 \AtBeginDocument{
214   \def\nmv@natbib@detect{%
215     \ifNAT@super

```

```

216     \expandafter\acs@nmv@activate
217     \else
218     \expandafter\acs@autonote
219     \fi
220 }
221 }
222 \newcommand*\acs@nmv@activate{%
223   \let\nmv@citex@nat\@citex
224   \let\@citex\nmv@citex
225   \let\nmv@cite\cite
226   \renewcommand*\cite}[2] []{%
227     \nmv@ifmtarg{##1}{%
228       \nmv@citetrue
229       \nmv@cite{##2}%
230     }{%
231       \nocite{##2}%
232       \bibnote{Ref.~\citenum{##2}, ##1}%
233     }%
234   }%
235 }
236 \newcommand*\acs@autonote{%
237   \let\nmv@cite\cite
238   \renewcommand*\cite}[2] []{%
239     \nmv@ifmtarg{##1}{%
240       \nmv@cite{##2}%
241     }{%
242       \nocite{##2}%
243       \bibnote{Ref.~\citenum{##2}, ##1}%
244     }%
245   }%
246 }

```

`\acs@bib@file` Some information or creating the control file for Bib<sub>T</sub><sub>E</sub>X is set up.

```

\acs@bib@message 247 \newwrite\acs@bib@file
\acs@bib@name     248 \newcommand*\acs@bib@message{%
249   This is an auxiliary file used by the ‘achemso’ bundle.^^J%
250   This file may safely be deleted. It will be recreated as required.^^J
251 }
252 \newcommand*\acs@bib@name{acs-\jobname.bib}

```

`\acs@bib@write` The control information for Bib<sub>T</sub><sub>E</sub>X needs to be written to a special file. The main  
`\acs@bib@write@aux` writing macro is quite simple. Actually writing the information is left to the code  
for `\bibliography`, so that this only happens if needed.

```

253 \newcommand*\acs@bib@write{%
254   \if@filesw
255     \expandafter\acs@bib@write@aux
256   \fi
257 }
258 \AtBeginDocument{\acs@bib@write}
259 \newcommand*\acs@bib@write@aux{%
260   \immediate\openout\acs@bib@file\acs@bib@name\relax
261   \immediate\write\acs@bib@file{\acs@bib@message}%
262   \edef\@tempa##1##2{%
263     \space\space##1\space = "##2",^^J%

```

```

264 }%
265 \immediate\write\acs@bib@file{%
266   @Control\string{%
267     achemso-control,^^J%
268     \@tempa{ctrl-article-title\space}{%
269       \ifacs@articletitle yes\else no\fi
270     }%
271     \@tempa{ctrl-chapter-title\space}{%
272       \ifacs@chaptertitle yes\else no\fi
273     }%
274     \@tempa{ctrl-doi\space\space\space\space\space\space\space\space
275       \space\space\space\space}{%
276       \ifacs@doi yes\else no\fi
277     }%
278     \@tempa{ctrl-etal-number\space\space\space}{\acs@maxauthors}%
279     \@tempa{ctrl-etal-firstonly}{%
280       \ifacs@etal@truncate no\else yes\fi
281     }%
282     \string}^^J%
283 }%
284 \immediate\write\@auxout{%
285   \string\citation\string{achemso-control\string}%
286 }%
287 \AtEndDocument{%
288   \immediate\closeout\acs@bib@file\relax
289 }%
290 }

```

`\acs@bibliography` The `\bibliography` macro is now patched so that everything works correctly.

```

\bibliography 291 \AtBeginDocument{%
292   \let\acs@bibliography\bibliography
293   \def\bibliography#1{%
294     \acs@bibliography{acs-\jobname,#1}%
295   }%
296 }

```

`\latin` The journal *ACS Nano* formats Latin phrases differently from every other ACS journal: we provide a `\latin` command to cover this.

```

297 \AtBeginDocument{
298   \providecommand{\latin}[1]{#1}
299 }
300 </package | class>

```

## 1.4 Late class-only code

Most of the power of the class is now created. First, a few options are reset so that any given by the user are effectively ignored.

```

301 (*class)
302 \setkeys{acs}{
303   abbreviations = false,
304   articletitle  = true,
305   biblabel      = brackets,
306   biochem       = false,

```



```

307 doi           = false,
308 etalmode      = firstly,
309 keywords      = false,
310 maxauthors    = 15,
311 super         = true
312 }

```

When using the class, notes2bib is always emulated. Other standard support packages can now be loaded.

```

313 \acs@niib@create
314 \RequirePackage[margin=2.54cm]{geometry}
315 \RequirePackage{
316   caption,
317   float,
318   graphicx,
319   setspace,
320   url
321 }
322 \ifacs@hyperref
323   \expandafter\RequirePackage
324 \else
325   \expandafter@gobble
326 \fi
327 {hyperref}
328 \AtBeginDocument{\doublespacing}

```

`\title` For the meta-data, the REVTeX bundle provides a good model for the commands  
`\@title` to give the author. `\gdef` is used here to avoid any odd grouping issues.

```

\acs@title@short 329 \renewcommand*{\title}[2] []{%
330   \gdef\acs@title@short{#1}%
331   \gdef\@title{#2}%
332   \ifx\acs@title@short\@empty
333     \global\let\acs@title@short\@title
334   \fi
335 }
336 \@onlypreamble\title

```

`\acs@author@cnt` achemso tracks the number authors, affiliations and alternative affiliations.

```

\acs@affil@cnt 337 \newcount\acs@author@cnt
\acs@affil@alt@cnt 338 \newcount\acs@affil@cnt
339 \newcount\acs@affil@alt@cnt

```

`\acs@footnote@cnt` Two counts for getting affiliation footnotes correct.

```

\acs@affil@marker@cnt 340 \newcount\acs@footnote@cnt
341 \newcount\acs@affil@marker@cnt

```

`\author` The author macro stores the current author details and sets the affiliation of the author to the current one. Everything is `\global` so that there is no possibility of begin trapped inside a group. The affiliation counter is always one behind, and so it is locally incremented to keep the logic of the code clear elsewhere.

```

342 \def\author#1{%
343   \global\advance\acs@author@cnt\@ne\relax
344   \expandafter\gdef\csname @author@\@roman\acs@author@cnt\endcsname{#1}%
345   \begingroup

```

```

346 \advance\acs@affil@cnt\@ne
347 \expandafter\xdef\csname @author@affil@\@roman
348 \acs@author@cnt\endcsname
349 {\the\acs@affil@cnt}%
350 \endgroup
351 }
352 \@onlypreamble\author

```

\and Neither \and nor \thanks are used by the document class.

```

\thanks 353 \def\and{%
354 \acs@warning{%
355 \string\and\space not used by the achemso class: please see
356 the\MessageBreak package documentation for details%
357 }%
358 }
359 \def\thanks{%
360 \acs@warning{%
361 \string\thanks\space not used by the achemso class: please see
362 the\MessageBreak the package documentation for details%
363 }%
364 }

```

\affiliation As with \author, everything is \global just in case. The system insists that affiliations come after authors. Before anything is committed, a check is made that the affiliation has not already been seen.

```

365 \newcommand*\affiliation[2][\relax]{%
366 \ifnum\acs@author@cnt>\z@\relax
367 \acs@affil@ifdup{#2}{%
368 \acs@affil@swap{#2}%
369 }{%
370 \global\advance\acs@affil@cnt\@ne\relax
371 \expandafter\gdef\csname @address@\@roman\acs@affil@cnt\endcsname
372 {#2}%
373 \ifx\relax#1\relax
374 \expandafter\gdef\csname @affil@\@roman\acs@affil@cnt\endcsname
375 {#2}%
376 \else
377 \expandafter\gdef\csname @affil@\@roman\acs@affil@cnt\endcsname
378 {#1}%
379 \fi
380 }%
381 \else
382 \acs@warning{Affiliation with no author}%
383 \fi
384 }
385 \@onlypreamble\affiliation

```

\acs@affil@ifdup A short test for two addresses being identical.

```

\acs@affil@ifdup@aux 386 \newcommand*\acs@affil@ifdup[1]{%
387 \begingroup
388 \def\@tempa{#1}%
389 \@tempswafalse
390 \@tempcnta\z@\relax
391 \acs@affil@ifdup@aux

```

```

392 \if@tempswa
393 \aftergroup\@firstoftwo
394 \else
395 \aftergroup\@secondoftwo
396 \fi
397 \endgroup
398 }
399 \newcommand*\acs@affil@ifdup@aux{%
400 \advance\@tempcnta\@ne\relax
401 \expandafter\expandafter\expandafter\def\expandafter\expandafter
402 \expandafter\@tempb\expandafter\expandafter\expandafter
403 {\csname @address@\@roman\@tempcnta\endcsname}%
404 \ifx\@tempa\@tempb
405 \expandafter\@tempswatrue
406 \else
407 \ifnum\@tempcnta<\acs@affil@cnt\relax
408 \expandafter\expandafter\expandafter\acs@affil@ifdup@aux
409 \fi
410 \fi
411 }

```

`\acs@affil@swap` If the affiliation has already been given, then all of the authors need to be checked to make sure that the correct affiliation is used. First, the loop from above is used to find the correct number for the duplicate.

```

412 \newcommand*\acs@affil@swap[1]{%
413 \begingroup
414 \def\@tempa{#1}%
415 \@tempcnta\z@\relax
416 \@tempcntb\z@\relax
417 \acs@affil@ifdup@aux
418 \advance\acs@affil@cnt\@ne\relax
419 \acs@affil@swap@aux
420 \endgroup
421 }
422 \newcommand*\acs@affil@swap@aux{%
423 \advance\@tempcntb\@ne\relax
424 \expandafter\ifnum\csname @author@affil@\@roman\@tempcntb\endcsname
425 = \acs@affil@cnt\relax
426 \expandafter\xdef\csname @author@affil@\@roman\@tempcntb\endcsname{%
427 \the\@tempcnta
428 }%
429 \fi
430 \ifnum\@tempcntb<\acs@author@cnt\relax
431 \expandafter\acs@affil@swap@aux
432 \fi
433 }

```

`\alsoaffiliation` To allow complex affiliations, two commands are needed. The first deals with affiliations that are in some way shared by several authors. This is tracked on a per author basis.

```

434 \newcommand*\alsoaffiliation[2][\relax]{%
435 \ifnum\acs@author@cnt>\z@\relax
436 \acs@affil@ifdup{#2}{%
437 \acs@alsoaffil@find{#2}%

```

```

438 }{%
439   \global\advance\acs@affil@cnt\@ne\relax
440   \@tempcnta\acs@affil@cnt\relax
441   \expandafter\gdef\csname @address@\@roman\acs@affil@cnt\endcsname
442     {#2}%
443   \ifx\relax#1\relax
444     \expandafter\gdef\csname @affil@\@roman\acs@affil@cnt\endcsname
445       {#2}%
446   \else
447     \expandafter\gdef\csname @affil@\@roman\acs@affil@cnt\endcsname
448       {#1}%
449   \fi
450 }%
451 \ifundefined{@author@alsoaffil@\@roman\acs@author@cnt}{%
452   \expandafter\xdef\csname @author@alsoaffil@\@roman\acs@author@cnt
453     \endcsname{\the\@tempcnta}%
454 }{%
455   \expandafter\xdef\csname @author@alsoaffil@\@roman\acs@author@cnt
456     \endcsname{%
457     \csname @author@alsoaffil@\@roman\acs@author@cnt\endcsname
458     ,\the\@tempcnta
459   }%
460 }%
461 \else
462   \acs@warning{Affiliation with no author}%
463 \fi
464 }
465 \newcommand*\acs@alsoaffil@find[1]{%
466   \begingroup
467   \def\@tempa{#1}%
468   \@tempcnta\z@\relax
469   \@tempcntb\z@\relax
470   \acs@affil@ifdup@aux
471   \expandafter\endgroup
472   \expandafter\@tempcnta\the\@tempcnta\relax
473 }

```

`\altaffiliation` For the alternative affiliation, a second count is kept, and the affiliation is “attached” to the author. The way these are stored means that the appropriate affiliation number can be recovered later, and so printed correctly when things get complex.

```

474 \newcommand*\altaffiliation[1]{%
475   \ifnum\acs@author@cnt>\z@\relax
476   \begingroup
477     \acs@altaffil@ifdup{#1}{%
478       \expandafter\xdef\csname @author@altaffil@\@roman\acs@author@cnt
479         \endcsname{\the\@tempcnta}%
480     }{%
481       \global\advance\acs@affil@alt@cnt\@ne\relax
482       \expandafter\gdef\csname @altaffil@\@roman\acs@affil@alt@cnt
483         \endcsname{#1}%
484       \expandafter\xdef\csname @author@altaffil@\@roman\acs@author@cnt
485         \endcsname{\the\acs@affil@alt@cnt}%
486     }%

```

```

487 \endgroup
488 \else
489 \acs@warning{Affiliation with no author}%
490 \fi
491 }
492 \@onlypreamble\altaffiliation

```

`\acs@altaffil@ifdup` This is very similar to the same routine for normal affiliations but with the appropriate name changes.

```

493 \newcommand*\acs@altaffil@ifdup[1]{%
494 \def\@tempa{#1}%
495 \@tempswafalse
496 \@tempcnta\z@\relax
497 \ifnum\acs@affil@alt@cnt>\z@\relax
498 \expandafter\acs@altaffil@ifdup@aux
499 \fi
500 \if@tempswa
501 \expandafter\@firstoftwo
502 \else
503 \expandafter\@secondoftwo
504 \fi
505 }
506 \newcommand*\acs@altaffil@ifdup@aux{%
507 \advance\@tempcnta\@ne\relax
508 \expandafter\expandafter\expandafter\def\expandafter\expandafter
509 \expandafter\@tempb\expandafter\expandafter\expandafter
510 {\csname @altaffil@\@roman\@tempcnta\endcsname}%
511 \ifx\@tempa\@tempb
512 \expandafter\@tempswatrue
513 \else
514 \ifnum\@tempcnta<\acs@affil@alt@cnt\relax
515 \expandafter\expandafter\expandafter\acs@altaffil@ifdup@aux
516 \fi
517 \fi
518 }

```

`\email` E-mail addresses are attached to authors as well.

```

519 \newcommand*\email[1]{%
520 \ifnum\acs@author@cnt>\z@\relax
521 \expandafter\gdef\csname @email@\@roman\acs@author@cnt\endcsname
522 {#1}%
523 \else
524 \acs@warning{E-mail with no author}%
525 \fi
526 }
527 \@onlypreamble\email

```

`\fax` Fax and phone numbers are similar.

```

\phone 528 \newcommand*\fax[1]{%
529 \ifnum\acs@author@cnt>\z@\relax
530 \expandafter\gdef\csname @fax@\@roman\acs@author@cnt\endcsname
531 {#1}%
532 \else
533 \acs@warning{Fax number with no author}%

```

```

534 \fi
535 }
536 \@onlypreamble\fax
537 \newcommand*\phone[1]{%
538 \ifnum\acs@author@cnt>\z@\relax
539 \expandafter\gdef\csname @phone@\@roman\acs@author@cnt\endcsname
540 {#1}%
541 \else
542 \acs@warning{Phone number with no author}%
543 \fi
544 }
545 \@onlypreamble\phone

```

\abbreviations Some journals use these.

```

\@abbreviations 546 \newcommand*\abbreviations[1]{%
\keywords 547 \gdef\@abbreviations{#1}%
\@keywords 548 }
549 \newcommand*\@abbreviations{}
550 \@onlypreamble\abbreviations
551 \newcommand*\keywords[1]{%
552 \gdef\@keywords{#1}%
553 }
554 \newcommand*\@keywords{}
555 \@onlypreamble\keywords

```

\acs@abbreviations@print For printing the key simple meta-data.

```

\acs@keywords@print 556 \newcommand*\acs@abbreviations@print{%
\acs@title@short@print 557 \ifx\@abbreviations\@empty\else
558 \section*{Abbreviations}
559 \@abbreviations
560 \par
561 \fi
562 }
563 \newcommand*\acs@keywords@print{%
564 \ifx\@keywords\@empty\else
565 \section*{Keywords}
566 \@keywords
567 \par
568 \fi
569 }
570 \newcommand*\acs@title@short@print{%
571 \section*{Running header}
572 \acs@title@short
573 \par
574 }

```

\acs@space@pre@title Lengths for \@maketitle.

```

\acs@space@post@title 575 \newlength\acs@space@pre@title
\acs@space@post@author 576 \setlength\acs@space@pre@title{2em}
\acs@space@post@address 577 \newlength\acs@space@post@title
\acs@space@post@email 578 \setlength\acs@space@post@title{1.5em}
\acs@maketitle@width 579 \newlength\acs@space@post@author
580 \setlength\acs@space@post@author{1em}
581 \newlength\acs@space@post@address

```

```

582 \setlength\acs@space@post@address{1em}
583 \newlength\acs@space@post@email
584 \setlength\acs@space@post@email{1.5em}
585 \newlength\acs@maketitle@width
586 \setlength\acs@maketitle@width{\textwidth}

```

`\affilsize` Some simple size commands.

```

\authorsize 587 \newcommand*\affilsize{\normalsize}
\emailsize 588 \newcommand*\authorsize{\large}
\titlesize 589 \newcommand*\emailsize{\normalsize}
590 \newcommand*\titlesize{\LARGE}

```

`\authorfont` Font settings for `\@maketitle`.

```

\authorfont 591 \newcommand*\affilfont{\itshape}
\emailfont 592 \newcommand*\authorfont{\sffamily}
\titlefont 593 \newcommand*\emailfont{}
594 \newcommand*\titlefont{\bfseries\sffamily}

```

`\ps@acs` A shortcut to make page styles.

```

595 \newcommand*\ps@acs{}
596 \let\ps@acs\ps@plain

```

`\@maketitle` With the changes outlined above in place, a new `\@maketitle` macro is needed.

`\@maketitle@title@hook` This is partially a copy of the existing, but rather heavily modified.

```

597 \def\@maketitle{%
598   \pagestyle{acs}%
599   \ifnum\acs@author@cnt<\z@\relax
600     \acs@warning{No authors defined: At least one author is required}%
601     \fi
602   \newpage
603   \null
604   \vspace*{\acs@space@pre@title}%
605   \begin{center}
606     \begin{minipage}{\acs@maketitle@width}
607       \begin{center}
608         {%
609           \titlefont
610           \titlesize
611           \let\@fnsymbol\acs@author@fnsymbol
612           \let\footnote\acs@title@footnote
613           \acs@maketitle@suppinfo \@title
614           \acs@title@footnote@check
615           \global\acs@footnote@cnt\c@footnote
616           \@maketitle@title@hook
617           \par
618         }%
619       \vspace*{\acs@space@post@title}%
620     {%
621       \authorsize
622       \authorfont
623       \frenchspacing
624       \acs@author@list
625       \par
626     }%

```

```

627     \vspace*{\acs@space@post@author}%
628     {%
629         \affilsize
630         \affilfont
631         \acs@address@list
632         \par
633     }%
634     \vspace*{\acs@space@post@address}%
635     {%
636         \emailsize
637         \emailfont
638         \ifacs@email
639         \expandafter\acs@contact@details
640         \fi
641     }%
642     \vspace*{\acs@space@post@email}%
643     \end{center}
644     \end{minipage}
645     \end{center}%
646 }
647 \newcommand*\@maketitle@title@hook{}

```

`\acs@maketitle@suppinfo` This is spun out so that it can be avoided if necessary: this is done on the sly.

```

648 \newcommand*\acs@maketitle@suppinfo{%
649     \ifx\acs@manuscript\acs@manuscript@suppinfo
650         Supporting Information:\\
651     \fi
652 }

```

`\acs@title@footnote` Footnotes need to be created so that they appear correctly.

```

\acs@title@footnote@check 653 \newcommand*\acs@title@footnote[1]{%
654     \footnotemark
655     \g@addto@macro\@thanks{\footnotetext{#1}}%
656 }
657 \newcommand\acs@title@footnote@check{%
658     \ifx\@thanks\@empty
659     \else
660         \begingroup
661             \toks@=\expandafter{\@thanks}%
662             \xdef\@thanks{%
663                 \begingroup
664                     \let\noexpand\@fnsymbol\noexpand\acs@author@fnsymbol
665                     \the\toks@
666                 \endgroup
667             }%
668         \endgroup
669     \fi
670 }

```

`\acs@contact@details` A general contact details macro.

```

671 \newcommand*\acs@contact@details{%
672     { \sffamily E-mail: \acs@email@list }%
673     \acs@number@list
674 }

```



`\@thanks` The `\@thanks` macro is used as a hook to generate the footnotes if needed.

```
675 \let\@thanks\@empty
```

`\acs@author@list` Printing the author list needs to do several things. The appropriate separators between authors are created and the author names themselves are printed.

```
676 \newcommand*\acs@author@list{%
677   \@tempcnta\z@\relax
678   \ifnum\acs@author@cnt=\z@\relax\else
679     \expandafter\acs@author@list@main
680   \fi
681 }
```

`\acs@author@footnotes` The main control macro for producing the author list iterates over each author on the list. The result is stored as `\acs@author@listing`.

`\acs@author@list@main`

```
682 \newcommand*\acs@author@footnotes{}
683 \newcommand*\acs@author@list@main{%
684   \advance\@tempcnta\@ne\relax
685   \def\acs@author@footnotes{}%
686   \acs@author@list@and
687   \space
688   \@nameuse{@author@\@roman\@tempcnta}%
689   \acs@author@list@comma
690   \acs@author@star
691   \acs@author@affil
692   \acs@author@affil@also
693   \acs@author@affil@alt
694   \ifx\@empty\acs@author@footnotes\else
695     \textsuperscript{\acs@author@footnotes}%
696   \fi
697   \ifnum\@tempcnta<\acs@author@cnt\relax
698     \expandafter\acs@author@list@main
699   \fi
700 }
```

`\acs@author@list@and` Simple checks to add an “and” and a comma.

```
\acs@author@list@comma 701 \newcommand*\acs@author@list@and{%
702   \ifnum\acs@author@cnt=\@ne\relax\else
703     \ifnum\@tempcnta=\acs@author@cnt\relax
704       \space and%
705     \fi
706   \fi
707 }
708 \newcommand*\acs@author@list@comma{%
709   \ifnum\acs@author@cnt>\tw@\relax
710     \ifnum\@tempcnta<\acs@author@cnt\relax
711       ,%
712     \fi
713   \fi
714 }
```

`\acs@author@star` A check for an e-mail for an author: if so, add a star.

```
\acs@author@star@aux 715 \newcommand*\acs@author@star{%
716   \acs@ifundefined{@email@\@roman\@tempcnta}{-}{%
```

```

717 \acs@author@star@aux
718 }%
719 }
720 \newcommand*\acs@author@star@aux{%
721 \protected@edef\acs@author@footnotes{%
722 \acs@author@fnsymbol{\z@}%
723 \ifnum\acs@affil@cnt>\@ne\relax
724 ,%
725 \else
726 \ifnum\acs@affil@alt@cnt>\z@\relax
727 ,%
728 \fi
729 }%
730 }%
731 }

```

\acs@author@affil The main affiliation of the author is checked for, and assuming one is found the appropriate symbol is added to the list.

\acs@author@affil@aux

```

732 \newcommand*\acs@author@affil{%
733 \acs@ifundefined{%
734 @affil@\@roman\csname @author@affil@\@roman\@tempcnta\endcsname
735 }{%
736 \acs@warning{%
737 No affiliation given for author\MessageBreak
738 \@nameuse{@author@\@roman\@tempcnta}%
739 }%
740 }{%
741 \acs@author@affil@aux
742 }%
743 }
744 \newcommand*\acs@author@affil@aux{%
745 \ifnum\acs@affil@cnt>\@ne\relax
746 \expandafter\acs@affil@marker@cnt\csname @author@affil@\@roman
747 \@tempcnta\endcsname\relax
748 \advance\acs@affil@marker@cnt\acs@footnote@cnt\relax
749 \protected@edef\acs@author@footnotes{%
750 \acs@author@footnotes
751 \acs@author@fnsymbol{\acs@affil@marker@cnt}%
752 }%
753 \else
754 \ifnum\acs@affil@alt@cnt>\z@\relax
755 \acs@affil@marker@cnt\@ne\relax
756 \advance\acs@affil@marker@cnt\acs@footnote@cnt\relax
757 \protected@edef\acs@author@footnotes{%
758 \acs@author@footnotes
759 \acs@author@fnsymbol{\acs@affil@marker@cnt}%
760 }%
761 \fi
762 \fi
763 }

```

\acs@author@affil@also The “also” affiliations are generated by a loop as there may be more than one.

\acs@author@affil@also@aux

```

764 \newcommand*\acs@author@affil@also{%
765 \acs@ifundefined{@author@alsoaffil@\@roman\@tempcnta}{-}{%

```

```

766 \acs@author@affil@also@aux
767 }%
768 }
769 \newcommand*\acs@author@affil@also@aux{%
770 \expandafter\@for\expandafter\@tempa\expandafter:\expandafter
771 =\csname @author@alsoaffil@\@roman\@tempcnta\endcsname\do{%
772 \acs@affil@marker@cnt\@tempa\relax
773 \advance\acs@affil@marker@cnt\acs@footnote@cnt\relax
774 \protected@edef\acs@author@footnotes{%
775 \acs@author@footnotes
776 ,%
777 \acs@author@fnsymbol{\acs@affil@marker@cnt}%
778 }%
779 }%
780 }

```

`\acs@author@affil@alt` Alternative affiliations get the correct affiliation number back out from the stored data. There are then two corrections: one for the total number of main affiliations and a second in case there is a footnote to the title.

```

781 \newcommand*\acs@author@affil@alt{%
782 \acs@ifundefined{@author@altaffil@\@roman\@tempcnta}{-}{%
783 \acs@author@affil@alt@aux
784 }%
785 }
786 \newcommand*\acs@author@affil@alt@aux{%
787 \expandafter\acs@affil@marker@cnt
788 \csname @author@altaffil@\@roman\@tempcnta\endcsname\relax
789 \advance\acs@affil@marker@cnt\acs@affil@cnt\relax
790 \advance\acs@affil@marker@cnt\acs@footnote@cnt\relax
791 \protected@edef\acs@author@footnotes{%
792 \acs@author@footnotes
793 ,%
794 \acs@author@fnsymbol{\acs@affil@marker@cnt}%
795 }%
796 }

```

`\acs@author@fnsymbol` The ACS have an extended list of symbols. The star appears at the special position zero.

```

\acs@author@fnsymbol@aux
\acs@author@fnsymbol@loop
\acs@author@fnsymbol@loop@aux@i
\acs@author@fnsymbol@loop@aux@ii
\acs@author@fnsymbol@loop@aux@iii
\acs@author@fnsymbol@loop@aux@Q
\acs@author@fnsymbol@symbol
797 \newcommand*\acs@author@fnsymbol}[1]{%
798 \ensuremath{%
799 \expandafter\acs@author@fnsymbol@aux\expandafter{\number#1 }%
800 }%
801 }
802 \newcommand*\acs@author@fnsymbol@aux}[1]{%
803 \ifnum#1>10 %
804 \expandafter\acs@author@fnsymbol@loop
805 \else
806 \expandafter\acs@author@fnsymbol@symbol
807 \fi
808 {#1}%
809 }
810 \newcommand*\acs@author@fnsymbol@loop}[1]{%
811 \acs@author@fnsymbol@loop@aux@i#1%
812 }

```

```

813 \newcommand*\acs@author@fnsymbol@loop@aux@i}[2]{%
814   \acs@author@fnsymbol@symbol{\ifnum#2=0 10\else #2\fi}%
815   \expandafter\acs@author@fnsymbol@loop@aux@ii\romannumeral #1000Q{}%
816   {\acs@author@fnsymbol@symbol{\ifnum#2=0 10\else #2\fi}}%
817 }
818 \newcommand*\acs@author@fnsymbol@loop@aux@ii}[1]{%
819   \@nameuse{acs@author@fnsymbol@loop@aux@#1}%
820 }
821 \def\acs@author@fnsymbol@loop@aux@m#1Q#2#3{%
822   \acs@author@fnsymbol@loop@aux@ii#1Q{#2#3}{#3}%
823 }
824 \newcommand*\acs@author@fnsymbol@loop@aux@Q}[2]{#1}
825 \newcommand*\acs@author@fnsymbol@symbol}[1]{%
826   \ifcase #1 * \or
827     \dagger \or
828     \ddagger \or
829     \P \or
830     \S \or
831     \\\ \or
832     \bot \or
833     \# \or
834     @ \or
835     \triangle \or
836     \nabla
837   \fi
838 }

```

`\acs@address@list` Loop over the addresses and any extra affiliations and print them all: if there is only one, omit the marker entirely. There is also a need to watch out for any footnotes from the title.

```

839 \newcommand*\acs@address@list{%
840   \ifnum\acs@affil@cnt>\z@
841     \expandafter\acs@address@list@auxi
842   \else
843     \acs@warning{No affiliations: at least one affiliation is needed}%
844   \fi
845 }
846 \newcommand*\acs@address@list@auxi{%
847   \ifnum0%
848     \ifnum\acs@affil@cnt>\@ne 1\fi
849     \ifnum\acs@affil@alt@cnt>\z@ 1\fi
850     >\z@
851   \expandafter\acs@address@list@auxii
852   \else
853     \@address@i\par
854   \fi
855 }
856 \newcommand*\acs@address@list@auxii{%
857   \@tempcnta\z@
858   \acs@affil@marker@cnt\acs@footnote@cnt
859   \loop\ifnum\@tempcnta<\acs@affil@cnt
860     \advance\@tempcnta\@ne
861     \advance\acs@affil@marker@cnt\@ne
862     \acs@author@fnsymbol{\acs@affil@marker@cnt}%

```

```

863 \nameuse{@address@\@roman\@tempcnta}\par
864 \repeat
865 \@tempcnta\z@
866 \loop\ifnum\@tempcnta<\acs@affil@cnt
867 \advance\@tempcnta\@ne
868 \advance\acs@affil@marker@cnt\@ne
869 \acs@ifundefined{@altaffil@\@roman\@tempcnta}
870 {}
871 {%
872 \acs@author@fnsymbol{\acs@affil@marker@cnt}%
873 \nameuse{@altaffil@\@roman\@tempcnta}\par
874 }%
875 \repeat
876 }

```

\acs@fnsymbol@org Footnotes are done in two stages. First the main affiliation is handled, then the possible alternative. There is a need to check for the possibility that there is only one main affiliation but one or more alternative ones.

```

\acs@affil@list
\acs@affil@list@aux
877 \newcommand*\acs@fnsymbol@org{}
878 \newcommand*\acs@affil@list{%
879 \let\acs@fnsymbol@org\@fnsymbol
880 \let\@fnsymbol\acs@author@fnsymbol
881 \@tempcnta\z@\relax
882 \@tempcntb\z@\relax
883 \ifnum\acs@affil@cnt>\@ne\relax
884 \expandafter\acs@affil@list@aux
885 \else
886 \ifnum\acs@affil@alt@cnt>\z@\relax
887 \acs@affil@marker@cnt\@ne\relax
888 \advance\acs@affil@marker@cnt\acs@footnote@cnt\relax
889 \footnotetext[\acs@affil@marker@cnt]{\@affil@i}%
890 \@tempcnta\@ne\relax
891 \fi
892 \fi
893 \ifnum\acs@affil@alt@cnt>\z@\relax
894 \expandafter\acs@affil@alt@list
895 \fi
896 \let\@fnsymbol\acs@fnsymbol@org
897 }
898 \newcommand*\acs@affil@list@aux{%
899 \advance\@tempcnta\@ne\relax
900 \acs@affil@marker@cnt\@tempcnta\relax
901 \advance\acs@affil@marker@cnt\acs@footnote@cnt\relax
902 \footnotetext[\acs@affil@marker@cnt]{%
903 \nameuse{@affil@\@roman\@tempcnta}%
904 }%
905 \ifnum\@tempcnta<\acs@affil@cnt\relax
906 \expandafter\acs@affil@list@aux
907 \fi
908 }

```

\acs@affil@alt@list The secondary loop for alternative affiliations is similar.

```

\acs@affil@alt@list@aux
909 \newcommand*\acs@affil@alt@list{%
910 \advance\@tempcntb\@ne\relax

```

```

911 \acs@ifundefined{@altaffil@\@roman\@tempcntb}{-}{%
912 \acs@altaffil@foot@aux
913 }
914 \ifnum\@tempcntb<\acs@author@cnt\relax
915 \expandafter\acs@affil@alt@list
916 \fi
917 }
918 \newcommand*\acs@altaffil@foot@aux{%
919 \advance\@tempcnta\@ne\relax
920 \acs@affil@marker@cnt\@tempcnta\relax
921 \advance\acs@affil@marker@cnt\acs@footnote@cnt\relax
922 \footnotetext[\acs@affil@marker@cnt]{%
923 \@nameuse{@altaffil@\@roman\@tempcntb}}%
924 }%
925 }

```

\acs@email@list@font The final piece of meta-data to print is the e-mail address list. The total number  
 \acs@email@list of e-mail addresses given it counted in \@tempcntb, which means a warning  
 \acs@email@list@aux can be given if there are none. The group is used so that \UrlFont can be set  
 correctly.

```

926 \newcommand*\acs@email@list@font{\sf}
927 \newcommand*\acs@email@list{%
928 \begingroup
929 \def\UrlFont{\acs@email@list@font}%
930 \@tempcnta\z@\relax
931 \@tempcntb\z@\relax
932 \acs@email@list@aux
933 \ifnum\@tempcntb=\z@\relax
934 \acs@warning{%
935 No e-mail given:\MessageBreak
936 at least one author must have a contact e-mail%
937 }%
938 \fi
939 \endgroup
940 }
941 \newcommand*\acs@email@list@aux{%
942 \advance\@tempcnta\@ne\relax
943 \ifnum\@tempcnta>\acs@author@cnt\relax\else
944 \acs@ifundefined{@email@\@roman\@tempcnta}{-}{%
945 \advance\@tempcntb\@ne\relax
946 \ifnum\@tempcntb>\@ne\relax
947 ;
948 \fi
949 \expandafter\expandafter\expandafter\url\expandafter
950 \expandafter\expandafter{%
951 \csname @email@\@roman\@tempcnta\endcsname
952 }%
953 }%
954 \expandafter\acs@email@list@aux
955 \fi
956 }

```

\acs@number@list Listing phone and fax numbers is easier as they don't have to be given. Everything  
 \acs@number@list@aux@i is done in one block so that it is possible to know whether to add a new line and  
 \acs@number@list@aux@ii

also to keep everything together.

```
957 \newcommand*\acs@number@list{%
958   \begingroup
959     \acs@number@list@aux@i{phone}%
960     \let\@tempb\@tempa
961     \acs@number@list@aux@i{fax}%
962     \ifx\@tempa\@empty
963       \let\@tempa\@tempb
964     \else
965       \ifx\@tempb\@empty\else
966         \protected@edef\@tempa{%
967           \@tempb.\space\@tempa
968         }%
969       \fi
970     \fi
971     \ifx\@tempa\@empty\else
972       \par
973       \@tempa
974     \fi
975   \endgroup
976 }
977 \newcommand*\acs@number@list@aux@i[1]{%
978   \def\@tempa{}%
979   \@tempcnta\z@\relax
980   \def\acs@number@list@aux@ii{%
981     \advance\@tempcnta\@ne\relax
982     \ifnum\@tempcnta>\acs@author@cnt\relax\else
983       \acs@ifundefined{@#1@\@roman\@tempcnta}{-}{%
984         \acs@ifundefined{@email@\@roman\@tempcnta}{-}{%
985           \ifx\@tempa\@empty
986             \edef\@tempa{%
987               \@nameuse{@#1@\@roman\@tempcnta}%
988             }%
989           \else
990             \edef\@tempa{%
991               \@tempa
992             }%
993             \@nameuse{@#1@\@roman\@tempcnta}%
994           \fi
995         }%
996       }%
997     \expandafter\acs@number@list@aux@ii
998   \fi
999 }%
1000 }%
1001 \acs@number@list@aux@ii
1002 \ifx\@tempa\@empty\else
1003   \protected@edef\@tempa{%
1004     \MakeUppercase#1: \@tempa
1005   }%
1006 \fi
1007 }
1008 \newcommand*\acs@number@list@aux@ii{}
```

```

\endabstract
\acs@abstract@extras 1009 \g@addto@macro\endabstract{%
1010 \aftergroup\acs@abstract@extras
1011 }
1012 \newcommand*\acs@abstract@extras{%
1013 \ifacs@abbreviations
1014 \acs@abbreviations@print
1015 \par
1016 \fi
1017 \ifacs@keywords
1018 \acs@keywords@print
1019 \par
1020 \fi
1021 }

```

`\acs@maketitle@extras` A couple of things might need to be added to `\maketitle`.

```

\acs@maketitle@extras@hook 1022 \newcommand*\acs@maketitle@extras{%
1023 \acs@maketitle@extras@hook
1024 }
1025 \newcommand*\acs@maketitle@extras@hook{}
1026 \g@addto@macro{\maketitle}{\acs@maketitle@extras}

```

`\maketitle` is required by the document class, and must start the document. No variation is allowed, and so it is done automatically.

```

1027 \g@addto@macro{\document}{\maketitle}

```

`scheme` (*env.*) Three new float types are provided, `scheme`, `chart` and `graph`. These are the

`chart` (*env.*) most obvious types; for graphs, a slight problem arises with the file extension.

```

graph (env.) 1028 \newfloat{scheme}{htbp}{los}
1029 \floatname{scheme}{Scheme}
1030 \newfloat{chart}{htbp}{loc}
1031 \floatname{chart}{Chart}
1032 \newfloat{graph}{htbp}{loh}
1033 \floatname{graph}{Graph}

```

`\schemename` Naming is set up in the same way as the kernel floats.

```

\chartname 1034 \newcommand*\schemename{Scheme}
\graphname 1035 \newcommand*\chartname{Chart}
1036 \newcommand*\graphname{Graph}

```

The standard floats should appear “here” by default.

```

1037 \floatplacement{table}{htbp}
1038 \floatplacement{figure}{htbp}
1039 \floatstyle{plaintop}
1040 \restylefloat{table}

```

`\acs@floatboxreset` Floats are all centred.

```

1041 \let\acs@floatboxreset\@floatboxreset
1042 \def\@floatboxreset{%
1043 \centering
1044 \acs@floatboxreset
1045 }

```



```

\plainref For legacy support.
\ref 1046 \newcommand*\plainref{}
      1047 \AtBeginDocument{\let\plainref\ref}

\acs@section Both the numbering and existence of section headers may need to be altered.
\acs@subsection Some generic functions are therefore provided to deal with this cleanly. First,
\acs@subsubsection some original definitions are saved.
\acs@startsection@orig 1048 \newcommand*\acs@section{}
                       1049 \let\acs@section\section
                       1050 \newcommand*\acs@subsection{}
                       1051 \let\acs@subsection\subsection
                       1052 \newcommand*\acs@subsubsection{}
                       1053 \let\acs@subsubsection\subsubsection
                       1054 \newcommand*\acs@startsection@orig{}
                       1055 \let\acs@startsection@orig\@startsection

\acs@startsection A version of \@startsection which adds unnumbered sections to the TOC:
modelled on amsart. This is active as standard.
1056 \newcommand\acs@startsection[6]{%
1057 \ifnoskipsec \leavevmode \fi
1058 \par \@tempskipa #4\relax
1059 \@afterindenttrue
1060 \ifdim \@tempskipa <\z@ \@tempskipa -\@tempskipa \@afterindentfalse\fi
1061 \if@nobreak \everypar{}\else
1062     \addpenalty\@secpenalty\advspace\@tempskipa\fi
1063 \@ifstar{\@dblarg{\@sect{#1}{\@m}{#3}{#4}{#5}{#6}}}%
1064     {\@dblarg{\@sect{#1}{#2}{#3}{#4}{#5}{#6}}}%
1065 }
1066 \let\@startsection\acs@startsection

\acs@startsection@alt An alternative version of \@startsection which never adds numbers.
1067 \newcommand*\acs@startsection@alt[6]{%
1068 \ifnoskipsec \leavevmode \fi
1069 \par \@tempskipa #4\relax
1070 \@afterindenttrue
1071 \ifdim \@tempskipa <\z@ \@tempskipa -\@tempskipa \@afterindentfalse\fi
1072 \if@nobreak \everypar{}\else
1073     \addpenalty\@secpenalty\advspace\@tempskipa\fi
1074 \@ifstar{\@ssect{#3}{#4}{#5}{#6}}
1075     {\@ssect{#3}{#4}{#5}{#6}}%
1076 }

\acs@sections@none When removing sections entirely, a gobble macro is needed.
\acs@sections@none@aux 1077 \newcommand*\acs@sections@none{%
                       1078 \@ifstar{%
                       1079     \acs@sections@none@aux
                       1080 }{%
                       1081     \acs@sections@none@aux
                       1082 }%
                       1083 }
                       1084 \newcommand*\acs@sections@none@aux[2] []{%
                       1085 \acs@warning{%
                       1086     (Sub)section ‘#2’ ignored%

```

```

1087 }%
1088 }

```

`\SectionNumbersOff` To macros to add or remove the section numbers. The standard setting for the class has them on, but some configurations will turn them off. The names of these functions are both in design space so that users can change the decision easily.

```

1089 \newcommand*\SectionNumbersOff{%
1090 \let\@startsection\acs@startsection@alt
1091 }
1092 \@onlypreamble\SectionNumbersOff
1093 \newcommand*\SectionNumbersOn{%
1094 \let\@startsection\acs@startsection
1095 }
1096 \@onlypreamble\SectionNumbersOn

```

`\SectionsOff` Quite similar for entire sections.

```

\SectionsOn 1097 \newcommand*\SectionsOff{%
1098 \let\section\acs@sections@none
1099 \let\subsection\acs@sections@none
1100 \let\subsubsection\acs@sections@none
1101 }
1102 \@onlypreamble\SectionsOff
1103 \newcommand*\SectionsOn{%
1104 \let\section\acs@section
1105 \let\subsection\acs@subsection
1106 \let\subsubsection\acs@subsubsection
1107 }
1108 \@onlypreamble\SectionsOn

```

`\tableofcontents` Never print TOC in itself.

```

1109 \begingroup
1110 \toks@=\expandafter{\tableofcontents}
1111 \xdef\tableofcontents{%
1112 \begingroup
1113 \let\noexpand\@startsection\noexpand\acs@startsection@orig
1114 \the\toks@
1115 \endgroup
1116 }
1117 \endgroup

```

`acknowledgement (env.)` Simple named sections.

```

suppinfo (env.) 1118 \newenvironment{acknowledgement}{%
1119 \acs@section*{\acknowledgementname}%
1120 }{}
1121 \newenvironment{suppinfo}{%
1122 \acs@section*{\suppinfofname}%
1123 }{}

```

`\acknowledgementname` A few macros need to get around the changes.

```

\bibsection 1124 \newcommand*\acknowledgementname{Acknowledgement}
\suppinfofname 1125 \AtEndOfClass{%
1126 \def\bibsection{%

```

```

1127   \acs@section*{\refname}%
1128   }%
1129 }
1130 \newcommand*\suppinfoname{Supporting Information Available}

```

\acs@abstract Removing the abstract, if necessary, is done using a trick from the comment package. However, it code is copied here to keep requirements down.

```

\acs@endabstract
\acs@abstract@start 1131 \newcommand*\acs@abstract{}
\acs@abstract@end 1132 \let\acs@abstract\abstract
\acs@abstract@iffalse 1133 \newcommand*\acs@endabstract{}
1134 \let\acs@endabstract\endabstract
1135 \begingroup
1136 \catcode'{ \active
1137 \catcode'} 12\relax
1138 \catcode'( 1\relax
1139 \catcode') 2\relax
1140 \gdef\acs@abstract@start(%
1141 \acs@warning(%
1142 Abstract not allowed for this\MessageBreak
1143 manuscript type
1144 )%
1145 \@bsphack
1146 \catcode'{ \active
1147 \catcode'} 12\relax
1148 \let\end\fi
1149 \let{\acs@abstract@end% }
1150 \iffalse
1151 )%{
1152 \gdef\acs@abstract@end#1}{%
1153 \def\@tempa(#1)%
1154 \ifx\@tempa\@currenvir
1155 \@Esphack\endgroup
1156 \if@ignore
1157 \global\@ignorefalse
1158 \ignorespaces
1159 \fi
1160 \else
1161 \expandafter\acs@abstract@iffalse
1162 \fi
1163 )
1164 \endgroup
1165 \newcommand*\acs@iffalse{\iffalse}

```

\AbstractOff A very similar pattern to before.

```

\AbstractOn 1166 \newcommand*\AbstractOff{%
1167 \let\abstract\acs@abstract@start
1168 \let\endabstract\acs@abstract@end
1169 }
1170 \@onlypreamble\AbstractOff
\AbstractOn 1171 \newcommand*\AbstractOn{%
1172 \let\abstract\acs@abstract
1173 \let\endabstract\acs@endabstract
1174 }
1175 \@onlypreamble\AbstractOn

```

`\acs@collect@toks` The content of the graphic TOC entry is processed using a method from `amsmath`  
`\acs@collect@content` *via* `environ`. The entire environment is gathered for typesetting in a box. First,  
`\acs@collect@content` some storage is needed.

```
1176 \newtoks\acs@collect@toks
1177 \newtoks\acs@collect@empty@toks
1178 \newcommand*\acs@collect@begins{}
1179 \newcommand*\acs@collect@content{}
```

`\acs@collect` This is a `\long` version of `\collect@body`.

```
\acs@collect@aux 1180 \newcommand\acs@collect[1]{%
\acs@collect@begins@ 1181 \acs@collect@toks{%
\acs@collect@body 1182 \expandafter#1\expandafter{\the\acs@collect@toks}%
1183 }%
1184 \edef\acs@collect@content{%
1185 \the\acs@collect@toks
1186 \noexpand\end{\@currenvir}}%
1187 }%
1188 \acs@collect@toks\acs@collect@empty@toks
1189 \def\acs@collect@begins{b}%
1190 \begingroup
1191 \expandafter\let\csname\@currenvir\endcsname\acs@collect@aux
1192 \edef\acs@collect@content{%
1193 \expandafter\noexpand\csname\@currenvir\endcsname
1194 }%
1195 \acs@collect@content
1196 }
1197 \newcommand*\acs@collect@aux{}
1198 \long\def\acs@collect@aux#1\end#2{%
1199 \edef\acs@collect@begins{%
1200 \acs@collect@begins@#1\begin\end
1201 \expandafter\@gobble\acs@collect@begins
1202 }%
1203 \ifx\@empty\acs@collect@begins
1204 \endgroup
1205 \@checkend{#2}%
1206 \acs@collect@body{#1}%
1207 \else
1208 \acs@collect@body{#1\end{#2}}%
1209 \fi
1210 \acs@collect@content
1211 }
1212 \newcommand*\acs@collect@begins@{}
1213 \long\def\acs@collect@begins@#1\begin#2{%
1214 \ifx\end#2\else
1215 b\expandafter\acs@collect@begins@
1216 \fi
1217 }
1218 \newcommand\acs@collect@body[1]{%
1219 \global\acs@collect@toks\expandafter{\the\acs@collect@toks#1}%
1220 }
```

`\acs@abstract@print` Delayed abstract printing works in a similar way, but with some formatting ‘built-in’.

```

1221 \newcommand\acs@abstract@print[1]{%
1222   \global\long\def\acs@abstract@text{%
1223     \if@twocolumn
1224       \@restonecoltrue\onecolumn
1225     \else
1226       \@restonecolfalse\newpage
1227     \fi
1228     \acs@section*{Abstract}%
1229     #1%
1230     \if@restonecol
1231       \twocolumn
1232     \else
1233       \newpage
1234     \fi
1235   }%
1236 \AtEndDocument{\acs@abstract@text}%
1237 }

```

\acs@tocentry@print The same approach is taken for the graphical table of content printing. This is  
\acs@tocentry@print@aux done in a box so that everything has a frame around it.

```

\acs@tocentry@text
1238 \newcommand{\acs@tocentry@print}[1]{%
1239   \gdef\acs@tocentry@text{\normalsize#1}%
1240   \AtEndDocument{%
1241     \if@twocolumn
1242       \@restonecoltrue\onecolumn
1243     \else
1244       \@restonecolfalse\newpage
1245     \fi
1246     \acs@tocentry@print@aux
1247     \if@restonecol
1248       \twocolumn
1249     \else
1250       \newpage
1251     \fi
1252   }%
1253 }
1254 \newcommand*{\acs@tocentry@print@aux}{%
1255   \begingroup
1256   \let\@startsection\acs@startsection@orig
1257   \acs@section*{\tocentryname}%
1258   \tocsize
1259   \sffamily
1260   \singlespacing
1261   \begin{center}
1262     \fbox
1263     {%
1264       \begin{minipage}{\acs@tocentry@width}
1265         \vbox to \acs@tocentry@height{\acs@tocentry@text}%
1266       \end{minipage}%
1267     }%
1268   \end{center}%
1269 \endgroup
1270 }
1271 \newcommand*\acs@tocentry@text{TOC ENTRY REQUIRED}

```

```

1272 \newlength{\acs@tocentry@height}
1273 \newlength{\acs@tocentry@width}
1274 \setlength{\acs@tocentry@height}{1.75in}
1275 \setlength{\acs@tocentry@width}{3.25in}

```

`tocentry` (*env.*) Actually creating the entry is pretty easy.

```
1276 \newenvironment{tocentry}{\acs@collect\acs@tocentry@print}{}
```

`\tocentryname` A simple name macro.

```
1277 \newcommand*\tocentryname{TOC Graphic}
```

`\tocsize` The font size for printing the TOC entry.

```

1278 \newcommand*\tocsize{%
1279   \@setfontsize\tocsize\@viipt\@ixpt
1280 }

```

`\acs@type@list` Different journals allow different types of article. A list is set up here: different journals can then alter it. A check function is also provided along with a default.

```

\acs@type@default
\acs@type@check
1281 \newcommand*\acs@type@list{article,communication,supinfo}
1282 \newcommand*\acs@type@default{article}
1283 \newcommand*\acs@type@check{%
1284   \@tempswafalse
1285   \@for\@tempa:=\acs@type@list\do{%
1286     \ifx\@tempa\acs@manuscript
1287       \expandafter\@tempswatrue
1288     \fi
1289   }%
1290   \if@tempswa\else
1291     \acs@warning{%
1292       Invalid manuscript type \acs@manuscript:\MessageBreak
1293       changed to default type \acs@type@default
1294     }%
1295     \let\acs@manuscript\acs@type@default
1296   \fi
1297 }

```

A few bits for older versions.

```

1298 \newcommand*\acs@setkeys{\setkeys{acs}}
1299 \let\acs@killabstract\AbstractOff
1300 \let\acs@killsecs\SectionsOff
1301 \newcommand*\acs@validtype[2][article]{%
1302   \def\acs@type@default{#1}%
1303   \def\acs@type@list{#2}%
1304 }

```

`\acs@par` A saved paragraph.

```

1305 \newcommand*\acs@par{}
1306 \let\acs@par\par

```

`\acs@layout@shared` Some code is used generally when setting up “press ready” layouts. There is acknowledgement (*env.*) quite a bit here, mainly layout related.

```

suppinfo (env.)
1307 \newcommand*\acs@layout@shared{%
1308   \AtBeginDocument{\singlespacing}%

```

```

1309 \twocolumn
1310 \tolerance=2000\relax
1311 \emergencystretch=10pt\relax
1312 \geometry{
1313   letterpaper,
1314   top    = 12.7mm,
1315   bottom = 16.8mm,
1316   left   = 19.3mm,
1317   right  = 19.3mm
1318 }%
1319 \setlength{\columnsep}{8.1mm}%
1320 \setlength{\parindent}{3.3mm}%
1321 \renewenvironment{acknowledgement}{%
1322   \def\@tempa{acknowledgement}%
1323   \ifx\@currenvir\@tempa
1324     \let\par\relax
1325     \acksizesize
1326     \vspace{6pt}%
1327     \textbf{\acknowledgementname}%
1328   \else
1329     \acs@section*\acknowledgementname}%
1330   \fi
1331 }{%
1332   \acs@par
1333 }%
1334 }

```

`\acksizesize` More sizes.

```

\suppsizesize 1335 \newcommand*\acksizesize{\normalsize}
1336 \newcommand*\suppsizesize{\normalsize}

```

`\acs@layout@nine` The class loads twelve point text. To reset it for print layouts, it is easiest to do things directly.

```

\acs@layout@ten 1337 \newcommand*\acs@layout@nine{%
1338   \def\@xipt{11}%
1339   \long\def\normalsize{%
1340     \@setfontsize\normalsize\@ixpt\@xipt
1341   }%
1342   \normalsize
1343   \let\@listi\@listI
1344   \abovedisplayskip 5\p@ \@plus2\p@ \@minus 5\p@\relax
1345   \abovedisplayshortskip \z@ \@plus3\p@\relax
1346   \belowdisplayshortskip 3\p@ \@plus3\p@ \@minus 3\p@\relax
1347   \belowdisplayskip\abovedisplayskip\relax
1348   \abovecaptionskip 5\p@\relax
1349   \intextsep 7\p@ \@plus 2\p@ \@minus 2\p@\relax
1350 }
1351 \newcommand*\acs@layout@ten{%
1352   \long\def\normalsize{%
1353     \@setfontsize\normalsize\@xpt\@xipt
1354   }%
1355   \normalsize
1356   \@setfontsize\normalsize\@xpt\@xipt
1357   \let\@listi\@listI

```

```

1358 \abovedisplayskip 10\p@ \@plus2\p@ \@minus5\p@\relax
1359 \abovedisplayshortskip \z@ \@plus3\p@\relax
1360 \belowdisplayshortskip 6\p@ \@plus3\p@ \@minus3\p@\relax
1361 \belowdisplayskip \abovedisplayskip\relax
1362 }

```

With all of the standard settings done, the journal configuration can be loaded.

```

1363 \InputIfFileExists{achemso-\acs@journal.cfg}{}{%
1364 \acs@warning{%
1365   Unknown journal ‘\acs@journal’:\MessageBreak
1366   using default configuration JACSAT%
1367 }%
1368 \input{achemso-jacsat.cfg}%
1369 }

```

Suppress spurious warnings.

```

1370 \let\@unusedoptionlist\@empty

```

`\thepage` Some changes that can always be applied if the manuscript type is appropriate: this saves some repetition in the configuration files.

```

1371 \acs@type@check
1372 \ifx\acs@manuscript\acs@manuscript@note
1373 \SectionsOff
1374 \fi
1375 \ifx\acs@manuscript\acs@manuscript@review
1376 \SectionsOn
1377 \SectionNumbersOn
1378 \fi
1379 \ifx\acs@manuscript\acs@manuscript@suppinfo
1380 \setkeys{acs}{maxauthors = 0}
1381 \def\thepage{S-\arabic{page}}
1382 \renewcommand*\thefigure{S\@arabic\c@figure}
1383 \renewcommand*\thescheme{S\@arabic\c@scheme}
1384 \renewcommand*\thetable{S\@arabic\c@table}
1385 \AtBeginDocument
1386   {%
1387     \renewcommand*\citenumfont[1]{S#1}%
1388     \renewcommand*\bibnumfmt[1]{(S#1)}%
1389   }
1390 \fi

```

Set up two column layout.

```

1391 \begingroup
1392 \def\@tempa{twocolumn}
1393 \ifx\acs@layout\@tempa
1394 \aftergroup\acs@layout@shared
1395 \fi
1396 \def\@tempa{two-column}
1397 \ifx\acs@layout\@tempa
1398 \aftergroup\acs@layout@shared
1399 \fi
1400 \endgroup
1401 </class>

```



## 1.5 Late shared code

`\citenumfont` Changes to citations can now be made. The citation styles supplied here require `natbib`, which is loaded with the appropriate options. This part applies to the package as well as the class: it is here so that the load order is correct.

```
1402 < *class | package >
1403 \ifacs@super
1404   \RequirePackage[sort&compress,numbers,super]{natbib}
1405 \else
1406   \RequirePackage[sort&compress,numbers,round]{natbib}
1407   \def\citenumfont{\textit}
1408 \fi
1409 \define@key{acs}{super}[true]{%
1410   \def\@tempa{#1}%
1411   \def\@tempb{true}%
1412   \ifx\@tempa\@tempb
1413     \setcitestyle{super,open={},close={}}%
1414     \renewcommand*\citenumfont{}%
1415   \else
1416     \setcitestyle{round}%
1417     \renewcommand*\citenumfont{\textit}
1418   \fi
1419 }
1420 \RequirePackage{natmove}
```

The `mciteplus` package allows the construction of lists of references with sub-letters. However, it might not be available, and so it is only loaded if available: the `.bst` files should work either way. There is also a patch to get cross-references correct with the modified `\ref` macro used here. The reason for ensuring that `\@mciteNatbibCiteCmdList` is defined is that it allows for the case where people prevent `mciteplus` being loaded using `\ver@mciteplus.sty`.

```
1421 \IfFileExists{mciteplus.sty}{%
1422   \RequirePackage{mciteplus}
1423   \providecommand*\@mciteNatbibCiteCmdList{}%
1424   \edef\@tempa{\noexpand\in@{citenum}\@mciteNatbibCiteCmdList}}%
1425   \@tempa
1426   \ifin@
1427   \else
1428     \edef\@mciteNatbibCiteCmdList{\@mciteNatbibCiteCmdList,citenum}%
1429   \fi
1430 < *!package >
1431   \def\@mciteSubRef[##1]##2{\plainref{\@mcitereflabelprefix:##1:##2}}
1432 < /!package >
1433 }{}
```

`\acs@bibstyle` The next step is to sort out bibliography formatting. With both the package and the class, the bibliography style is determined without user intervention. The style is stored as it may need to be altered later.

```
1434 \newcommand*\acs@bibstyle{achemso}
1435 \ifacs@biochem
1436   \def\acs@bibstyle{biochem}
1437   \bibliographystyle{biochem}
1438 \else
```

```

1439 \bibliographystyle{achemso}
1440 \fi

```

`\acs@bibliographystyle` The original `\bibliographystyle` macro is now disabled: the underlying command is repeated otherwise problems cop up with `chapterbib`.

```

1441 \newcommand*\acs@bibliographystyle{}
1442 \let\acs@bibliographystyle\bibliographystyle
1443 \def\bibliographystyle#1{%
1444   \acs@warning{\string\bibliographystyle\space ignored}%
1445   \expandafter\acs@bibliographystyle\expandafter{\acs@bibstyle}%
1446 }
1447 </class | package>

```

## 1.6 Late package-only code

The `notes2bib` code may or may not be activated.

```

1448 (*package)
1449 \AtBeginDocument{%
1450   \ifpackageloaded{notes2bib}{-}{%
1451     \acs@niib@create
1452   }%
1453 }
1454 </package>

```

## 1.7 Moving citations with `natbib`

The code for moving citations is created as a separate package, as the code needed is the same in both cases.

```

1455 (*natmove)
1456 \ProvidesPackage{natmove}
1457   [2010/01/15 v1.1a Automatic citation moving with natbib]
1458 \RequirePackage{natbib}

```

`\nmv@ifmtarg` To keep down dependence on other packages, the very short code block from `ifmtarg` is copied here with an internal name.

```

1459 \newcommand*\nmv@ifmtarg{}
1460 \newcommand*\nmv@xifmtarg{}
1461 \begingroup
1462   \catcode'\Q 3\relax
1463   \long\gdef\nmv@ifmtarg#1{%
1464     \nmv@xifmtarg#1QQ\@secondoftwo\@firstoftwo\@nil
1465   }
1466   \long\gdef\nmv@xifmtarg#1#2Q#3#4#5\@nil{#4}
1467 \endgroup

```

`\ifnmv@cite` A flag is need to watch whether `\cite` or another macro is in use.

```

1468 \newif\ifnmv@cite

```

`\nmv@citex` Using the flag, either the new internal macro, or the `natbib` original, can be called.

```

1469 \newcommand*\nmv@citex{%
1470   \ifnmv@cite
1471     \expandafter\nmv@citex@moving

```

```

1472 \else
1473 \expandafter\nmv@citex@nat
1474 \fi
1475 }

```

\nmv@after Later, the argument for \cite will need to be saved.

```

1476 \newcommand*\nmv@after{}

```

\nmv@citex@moving The new version of \@citex is needed that looks ahead of the citation using \futurelet. There are three arguments to \@citex when using natbib. Other than that, the trick used here is similar to that in cite.

```

1477 \newcommand*\nmv@citex@moving{}
1478 \def\nmv@citex@moving[#1][#2]#3{%
1479 \leavevmode
1480 \skip@ \lastskip \relax
1481 \unskip
1482 \begingroup
1483 \def\nmv@after{\nmv@citex@nat[#1][#2]{#3}}%
1484 \global\nmv@citexfalse
1485 \nmv@citex@get@next \relax
1486 }

```

\nmv@citex@end To get things right at the end.

```

1487 \newcommand*\nmv@citex@end{%
1488 \nmv@after
1489 \endgroup
1490 }

```

\nmv@citex@get@next The next token on the input stack is saved into \nmv@citex@next, after gobbling up one token.

\nmv@citex@next

```

1491 \newcommand*\nmv@citex@get@next[1]{%
1492 \futurelet\nmv@citex@next\nmv@citex@punct
1493 }

```

\nmv@citex@punct The working macro for moving the punctuation. This is very much like \@citey

\nmv@citex@punct@undouble

\nmv@citex@loop

in the cite package. The initial assumption is that the loop will terminate, and so the recursion call will simply do the finalisation.

```

1494 \newcommand*\nmv@citex@punct{%
1495 \let\nmv@citex@loop\nmv@citex@end
1496 \ifx\nmv@citex@next.\relax
1497 \ifnum\spacefactor<\nmv@citex@sfac\else
1498 \expandafter\expandafter\expandafter\nmv@citex@punct@undouble
1499 \fi
1500 \fi
1501 \expandafter\nmv@citex@punct@aux\natmovechars\@nil
1502 \nmv@citex@loop
1503 }
1504 \newcommand*\nmv@citex@punct@undouble{%
1505 \let\nmv@citex@next \relax
1506 \let\nmv@citex@loop\nmv@citex@get@next
1507 }
1508 \newcommand*\nmv@citex@loop{}

```

`\nmv@citex@punct@aux` The final part of the punctuation moving system.

```
1509 \newcommand*\nmv@citex@punct@aux[1]{%
1510   \ifx\nmv@citex@next#1\@empty
1511     #1%
1512   \let\nmv@citex@loop\nmv@citex@get@next
1513   \fi
1514   \ifx#1\@nil\else
1515     \expandafter\nmv@citex@punct@aux
1516   \fi
1517 }
```

`\nmv@citex@sfac` The value of the spacing factor after a full stop is used to signal doubled punctuation. For French spacing, a bit of patching is needed.

```
1518 \mathchardef\nmv@citex@sfac3000\relax
1519 \expandafter\def\expandafter\frenchspacing\expandafter{%
1520   \frenchspacing
1521   \mathchardef\nmv@citex@sfac1001\relax
1522   \sfcode'\.\nmv@citex@sfac
1523   \sfcode'\?\nmv@citex@sfac
1524   \sfcode'\!\nmv@citex@sfac
1525 }
1526 \ifnum\sfcode'\.\=@m
1527   \frenchspacing
1528 \fi
```

`\nmv@citex@nat` The swap has to be done at the beginning of the document. The internal flag `\nmv@activate` from `natbib` is used, but under the circumstances we should be safe. `\cite` is also patched to make the system active.

```
1529 \newcommand*\nmv@citex@nat{}
1530 \newcommand*\nmv@activate{%
1531   \let\nmv@citex@nat\@citex
1532   \let\@citex\nmv@citex
1533   \let\nmv@cite\cite
1534   \renewcommand*\cite}[2] [] {%
1535     \nmv@ifmtarg{##1}{%
1536       \nmv@citetrue
1537       \nmv@cite{##2}%
1538     }{%
1539       \nmv@citefalse
1540       \nmv@cite[##1]{##2}}%
1541   }%
1542 }
```

`\nmv@natbib@detect` So that `natbib` options can be set without worrying about load order, `natmove` doesn't require `natbib`. So a test is needed to see if it is actually loaded. This is done as a macro so that the effect can be changed by `achemso`.

```
1543 \newcommand*\nmv@natbib@detect{%
1544   \@ifpackageloaded{natbib}{%
1545     \ifNAT@super
1546       \expandafter\nmv@activate
1547     \fi
1548   }{%
1549     \PackageInfo{natmove}{%

```

```

1550     The natbib package is not loaded.\MessageBreak
1551     Loading natmove will do nothing
1552   }%
1553 }%
1554 }
1555 \AtBeginDocument{\nmv@natbib@detect}

```

`\natmovechars` A user macro is needed for moving characters.

```

1556 \newcommand*\natmovechars{.,;:}
1557 \natmove

```

## 1.8 The configuration files

The configuration files for different journals are not very complex. Keeping everything separate simply helps with maintenance.

```

1558 (*abmcb8)
1559 \ProvidesFile{achemso-abmcb8.cfg}
1560 [2025-09-22 v3.14 achemso configuration: ACS Bio. Med. Chem. Au]
1561 \def\acs@type@list{article,review,letter,perspective,supinfo}
1562 \setkeys{acs}{keywords = true}
1563 \abmcb8
1564 (*aeacb3)
1565 \ProvidesFile{achemso-aeacb3.cfg}
1566 [2025-09-22 v3.14 achemso configuration: ACS Eng. Au]
1567 \def\acs@type@list{article,review,letter,perspective,supinfo}
1568 \setkeys{acs}{keywords = true}
1569 \aeacb3
1570 (*aeacc4)
1571 \ProvidesFile{achemso-aeacc4.cfg}
1572 [2025-09-22 v3.14 achemso configuration: ACS Env. Au]
1573 \def\acs@type@list{article,review,letter,perspective,supinfo}
1574 \setkeys{acs}{keywords = true}
1575 \aeacc4
1576 (*amacgu)
1577 \ProvidesFile{achemso-amacgu.cfg}
1578 [2025-09-22 v3.14 achemso configuration: ACS Mater. Au]
1579 \def\acs@type@list{article,review,letter,perspective,supinfo}
1580 \setkeys{acs}{keywords = true}
1581 \amacgu
1582 (*amachv)
1583 \ProvidesFile{achemso-amachv.cfg}
1584 [2025-09-22 v3.14 achemso configuration: ACS Meas. Au]
1585 \def\acs@type@list{article,review,letter,perspective,supinfo}
1586 \setkeys{acs}{keywords = true}
1587 \amachv
1588 (*anaccx)
1589 \ProvidesFile{achemso-anaccx.cfg}
1590 [2025-09-22 v3.14 achemso configuration: ACS Nanosci. Au]
1591 \def\acs@type@list{article,review,letter,perspective,supinfo}
1592 \setkeys{acs}{keywords = true}
1593 \anaccx
1594 (*abmcb8)
1595 \ProvidesFile{achemso-abmcb8.cfg}

```

```

1596 [2025-09-22 v3.14 achemso configuration: ACS Bio. Med. Chem. Au]
1597 \def\acs@type@list{article,review,letter,perspective,suppinfo}
1598 \setkeys{acs}{keywords = true}
1599 \</abmcb8>
1600 \*aoiab5)
1601 \ProvidesFile{achemso-aoiab5.cfg}
1602 [2025-09-22 v3.14 achemso configuration: ACS Org. Inorg. Au]
1603 \def\acs@type@list{article,review,letter,perspective,suppinfo}
1604 \setkeys{acs}{keywords = true}
1605 \</aoiab5>
1606 \*apcach)
1607 \ProvidesFile{achemso-apcach.cfg}
1608 [2025-09-22 v3.14 achemso configuration: ACS Phys. Bio. Med. Chem. Au]
1609 \def\acs@type@list{article,review,letter,perspective,suppinfo}
1610 \setkeys{acs}{keywords = true}
1611 \</apcach>
1612 \*appccd)
1613 \ProvidesFile{achemso-appccd.cfg}
1614 [2025-09-22 v3.14 achemso configuration: ACS Polym. Au]
1615 \def\acs@type@list{article,review,letter,perspective,suppinfo}
1616 \setkeys{acs}{keywords = true}
1617 \</appccd>
1618 \*achre4)
1619 \ProvidesFile{achemso-achre4.cfg}
1620 [2025-09-22 v3.14 achemso configuration: Acc. Chem. Res.]
1621 \setkeys{acs}{biblabel = plain}
1622 \def\acs@type@list{article,suppinfo}
1623 \def\abstractname{Conspectus}
1624 \</achre4>
1625 \*aaembp)
1626 \ProvidesFile{achemso-aaembp.cfg}
1627 [2025-09-22 v3.14 achemso configuration: ACS Appl. Electron. Mater.]
1628 \def\acs@type@list{article,letter,suppinfo}
1629 \setkeys{acs}{keywords = true}
1630 \</aaembp>
1631 \*aaemcq)
1632 \ProvidesFile{achemso-aaemcq.cfg}
1633 [2025-09-22 v3.14 achemso configuration: ACS Appl. Energy Mater.]
1634 \def\acs@type@list{article,letter,suppinfo}
1635 \setkeys{acs}{keywords = true}
1636 \</aaemcq>
1637 \*aamick)
1638 \ProvidesFile{achemso-aamick.cfg}
1639 [2025-09-22 v3.14 achemso configuration: ACS Appl. Mater. Interfaces]
1640 \def\acs@type@list{article,letter,suppinfo}
1641 \setkeys{acs}{keywords = true}
1642 \</aamick>
1643 \*aanmf6)
1644 \ProvidesFile{achemso-aanmf6.cfg}
1645 [2025-09-22 v3.14 achemso configuration: ACS Appl. Nano Mater.]
1646 \def\acs@type@list{article,letter,suppinfo}
1647 \setkeys{acs}{keywords = true}
1648 \</aanmf6>
1649 \*aapmcd)

```

```

1650 \ProvidesFile{achemso-aapmcd.cfg}
1651 [2025-09-22 v3.14 achemso configuration: ACS Appl. Polym. Mater.]
1652 \def\acs@type@list{article,letter,suppinfo}
1653 \setkeys{acs}{keywords = true}
1654 \</aapmcd>
1655 \*aastgj
1656 \ProvidesFile{achemso-aastgj.cfg}
1657 [2025-09-22 v3.14 achemso configuration: ACS Agri. Sci. Tech.]
1658 \def\acs@type@list{account,article,letter,retraction,review,viewpoint,suppinfo}
1659 \setkeys{acs}{keywords = true}
1660 \</aastgj>
1661 \*abseba
1662 \ProvidesFile{achemso-abseba.cfg}
1663 [2025-09-22 v3.14 achemso configuration: ACS Biomater. Sci. Eng.]
1664 \setkeys{acs}{keywords = true}
1665 \def\acs@type@list{article,review,suppinfo}
1666 \</abseba>
1667 \*accacs
1668 \ProvidesFile{achemso-accacs.cfg}
1669 [2025-09-22 v3.14 achemso configuration: ACS Catal.]
1670 \setkeys{acs}{keywords = true}
1671 \def\acs@type@list{article,letter,perspective,review,viewpoints,suppinfo}
1672 \SectionNumbersOff
1673 \</accacs>
1674 \*acscii
1675 \ProvidesFile{achemso-acscii.cfg}
1676 [2025-09-22 v3.14 achemso configuration: ACS Central Sci.]
1677 \def\acs@type@list{article,review,suppinfo}
1678 \setkeys{acs}{doi = true}
1679 \SectionNumbersOff
1680 \</acscii>
1681 \*abcct
1682 \ProvidesFile{achemso-abcct.cfg}
1683 [2025-09-22 v3.14 achemso configuration: ACS Chem. Biol.]
1684 \setkeys{acs}{
1685   biblabel = fullstop,
1686   biochem = true,
1687   super = false
1688 }
1689 \def\acs@type@list{article,letter,review,suppinfo}
1690 \SectionNumbersOff
1691 \</abcct>
1692 \*acncdm
1693 \ProvidesFile{achemso-acncdm.cfg}
1694 [2025-09-22 v3.14 achemso configuration: ACS Chem. Neurosci.]
1695 \def\acs@type@list{article,review,letter,suppinfo,viewpoint}
1696 \setkeys{acs}{
1697   biblabel = fullstop,
1698   biochem = true,
1699   keywords = true,
1700   super = false
1701 }
1702 \</acncdm>
1703 \*acsccc

```

```

1704 \ProvidesFile{achemso-acsccl.cfg}
1705 [2025-09-22 v3.14 achemso configuration: ACS Combinatorial Sci.]
1706 \def\acs@type@list{article,letter,review,perspective,account,note,suppinfo}
1707 \setkeys{acs}{keywords = true}
1708 \SectionNumbersOff
1709 </acsccl>
1710 <*aesccl>
1711 \ProvidesFile{achemso-aesccl.cfg}
1712 [2025-09-22 v3.14 achemso configuration: ACS Earth Space Chem.]
1713 \def\acs@type@list{article,suppinfo}
1714 \setkeys{acs}{keywords = true}
1715 </aesccl>
1716 <*aelccp>
1717 \ProvidesFile{achemso-aelccp.cfg}
1718 [2025-09-22 v3.14 achemso configuration: ACS Energy Lett.]
1719 \def\acs@type@list{letter,perspective,review,viewpoint,focus}
1720 \SectionsOff
1721 </aelccp>
1722 <*aecco>
1723 \ProvidesFile{achemso-aecco.cfg}
1724 [2025-09-22 v3.14 achemso configuration: ACS ES&T Eng.]
1725 \def\acs@type@list{article,feature,perspective,review,viewpoint}
1726 \setkeys{acs}{keywords = true}
1727 </aecco>
1728 <*aewcaa>
1729 \ProvidesFile{achemso-aewcaa.cfg}
1730 [2025-09-22 v3.14 achemso configuration: ACS ES&T Water]
1731 \def\acs@type@list{article,feature,perspective,review,viewpoint}
1732 \setkeys{acs}{keywords = true}
1733 </aewcaa>
1734 <*afsthl>
1735 \ProvidesFile{achemso-afsthl.cfg}
1736 [2025-09-22 v3.14 achemso configuration: ACS Food Sci. Tech.]
1737 \def\acs@type@list{account,article,perspective,retraction,review,viewpoint}
1738 \setkeys{acs}{keywords = true}
1739 </afsthl>
1740 <*ascefj>
1741 \ProvidesFile{achemso-ascefj.cfg}
1742 [2025-09-22 v3.14 achemso configuration: ACS Infect. Dis.]
1743 \def\acs@type@list{article,letter,perspective,review,viewpoint,suppinfo}
1744 \setkeys{acs}{keywords = true}
1745 \SectionsOff
1746 </ascefj>
1747 <*amlccd>
1748 \ProvidesFile{achemso-amlccd.cfg}
1749 [2025-09-22 v3.14 achemso configuration: ACS Macro Lett.]
1750 \def\acs@type@list{letter,suppinfo}
1751 \SectionsOff
1752 \setlength{\acs@tocentry@height}{4cm}
1753 \setlength{\acs@tocentry@width}{8cm}
1754 </amlccd>
1755 <*amlcef>
1756 \ProvidesFile{achemso-amlcef.cfg}
1757 [2025-09-22 v3.14 achemso configuration: ACS Mater. Lett.]

```



```

1758 \def\acs@type@list{letter,perspective,review,viewpoint,focus}
1759 \SectionsOff
1760 \amllcef
1761 \*amclct
1762 \ProvidesFile{achemso-amclct.cfg}
1763 [2025-09-22 v3.14 chemso configuration: ACS Med. Chem. Lett.]
1764 \def\acs@type@list{article,letter,perspective,suppinfo}
1765 \SectionNumbersOff
1766 \amclct
1767 \*amrcda
1768 \ProvidesFile{achemso-amrcda.cfg}
1769 [2025-09-22 v3.14 chemso configuration: Acc. Mater. Res.]
1770 \def\acs@type@list{account,article,editorial,retraction,suppinfo}
1771 \amrcda
1772 \*ancac3
1773 \ProvidesFile{achemso-ancac3.cfg}
1774 [2025-09-22 v3.14 chemso configuration: ACS Nano]
1775 \setkeys{acs}{
1776   abbreviations = true,
1777   biblabel      = fullstop,
1778   etalmode      = truncate,
1779   maxauthors    = 20,
1780   keywords      = true
1781 }
1782 \def\acs@type@list{article,perspective,suppinfo}
1783 \newcommand*\latin[1]{\emph{#1}}
1784 \SectionNumbersOff
1785 \ancac3
1786 \*anmafam
1787 \ProvidesFile{achemso-anmafam.cfg}
1788 [2025-09-22 v3.14 chemso configuration: ACS Nano Med.]
1789 \setkeys{acs}{
1790   abbreviations = true,
1791   articletitle  = true,
1792   biblabel      = fullstop,
1793   etalmode      = truncate,
1794   maxauthors    = 20,
1795   keywords      = true
1796 }
1797 \def\acs@type@list{editorial,viewpoint,perspective,review,article,suppinfo}
1798 \anmafam
1799 \*acsodf
1800 \ProvidesFile{achemso-acsodf.cfg}
1801 [2025-09-22 v3.14 chemso configuration: ACS Omega.]
1802 \def\acs@type@list{article}
1803 \acsodf
1804 \*apchd5
1805 \ProvidesFile{achemso-apchd5.cfg}
1806 [2025-09-22 v3.14 chemso configuration: ACS Photon.]
1807 \def\acs@type@list{article,letter,perspective,review,suppinfo}
1808 \setkeys{acs}{keywords = true}
1809 \ifx\acs@manuscript\acs@manuscript@letter
1810   \SectionNumbersOff
1811 \fi

```

```

1812 </apchd5>
1813 <*aidcbc>
1814 \ProvidesFile{achemso-aidcbc.cfg}
1815 [2025-09-22 v3.14 achemso configuration: ACS Sensors]
1816 \def\acs@type@list{article,letter,perspective,review,supinfo}
1817 \setkeys{acs}{keywords = true}
1818 \SectionNumbersOff
1819 </aidcbc>
1820 <*ascecg>
1821 \ProvidesFile{achemso-ascecg.cfg}
1822 [2025-09-22 v3.14 achemso configuration: ACS Sustainable Chem Eng.]
1823 \setkeys{acs}{
1824   biblabel = fullstop,
1825   keywords = true
1826 }
1827 \SectionNumbersOff
1828 \def\acs@type@list{article,feature,letter,perspective,review,supinfo}
1829 </ascecg>
1830 <*asbcd6>
1831 \ProvidesFile{achemso-asbcd6.cfg}
1832 [2025-09-22 v3.14 achemso configuration: ACS Synth. Biol.]
1833 \setkeys{acs}{
1834   abbreviations = true,
1835   biblabel      = fullstop,
1836   biochem       = true,
1837   keywords      = true,
1838   super         = false
1839 }
1840 \def\acs@type@list{article,letter,note,tutorial,review,supinfo}
1841 </asbcd6>
1842 <*ancham>
1843 \ProvidesFile{achemso-ancham.cfg}
1844 [2025-09-22 v3.14 achemso configuration: Anal. Chem.]
1845 \def\acs@type@list{article,note,supinfo}
1846 \SectionNumbersOff
1847 </ancham>
1848 <*bichaw>
1849 \ProvidesFile{achemso-bichaw.cfg}
1850 [2025-09-22 v3.14 achemso configuration: Biochemistry]
1851 \setkeys{acs}{
1852   abbreviations = true,
1853   biblabel      = brackets,
1854   biochem       = true,
1855 }
1856 \SectionNumbersOff
1857 \def\acs@maketitle@extras@hook{%
1858   \par
1859   \acs@title@short@print
1860 }
1861 \g@addto@macro{\maketitle}{\newpage}
\acs@author@fnsymbol Some changes to do with footnotes: symbols are different and symbol number
one can only be used for the title.
1862 \def\acs@author@fnsymbol#1{%

```

```

1863 \ensuremath{%
1864   \ifcase #1 *\or
1865     \dagger\or
1866     \ddagger\or
1867     \S\or
1868     \parallel\or
1869     \perp\or
1870     \P\or
1871     \|\or
1872     \bot\or
1873     \#\or
1874     @\or
1875     \triangle\or
1876     \nabla\else
1877       #1%
1878   \fi
1879 }%
1880 }
1881 \def\@maketitle@title@hook{%
1882   \ifnum\acs@footnote@cnt>\@ne
1883   \else
1884     \global\acs@footnote@cnt\@ne
1885   \fi
1886 }

1887 </bichaw>
1888 <*bcches>
1889 \ProvidesFile{achemso-bcches.cfg}
1890 [2025-09-22 v3.14 achemso configuration: Bioconjugate Chem.]
1891 \setkeys{acs}{
1892   biochem = true,
1893   super   = false
1894 }
1895 \SectionNumbersOff
1896 </bcches>
1897 <*bomaf6>
1898 \ProvidesFile{achemso-bomaf6.cfg}
1899 [2025-09-22 v3.14 achemso configuration: Biomacromolecules]
1900 \def\acs@type@list{article,comment,communication,note,review,supinfo}
1901 \SectionNumbersOff
1902 \AtEndOfClass{\SectionsOn}
1903 </bomaf6>
1904 <*crtoec>
1905 \ProvidesFile{achemso-crtoec.cfg}
1906 [2025-09-22 v3.14 achemso configuration: Chem. Res. Toxicol.]
1907 \setkeys{acs}{
1908   abbreviations = true,
1909   biochem       = true,
1910   keywords      = true
1911 }
1912 \def\acs@maketitle@extras@hook{%
1913   \par
1914   \acs@title@short@print
1915 }

```

```

1916 \def\acs@type@list{%
1917   article,perspective,profile,review,supinfo%
1918 }
1919 \SectionNumbersOff
1920 </crtoc>
1921 <*chreay>
1922 \ProvidesFile{achemso-chreay.cfg}
1923 [2025-09-22 v3.14 achemso configuration: Chem. Rev.]
1924 \setkeys{acs}{
1925   etalmode      = truncate,
1926   maxauthors    = 10
1927 }
1928 \def\acs@type@default{review}
1929 \def\acs@type@list{review}

The references section is numbered in Chem. Rev.

1930 \floatstyle{plaintop}
1931 \restylefloat{scheme}
1932 \floatstyle{plain}
1933 \def\bibsection{\acs@section{\refname}}
1934 </chreay>
1935 <*cmatex>
1936 %   \begin{macrocode}
1937 \ProvidesFile{achemso-cmatex.cfg}
1938 [2025-09-22 v3.14 achemso configuration: Chem. Mater.]
1939 \setkeys{acs}{keywords = true}
1940 \SectionNumbersOff
1941 \ifx\acs@manuscript\acs@manuscript@communication
1942   \AbstractOff
1943   \SectionsOff
1944 \fi
1945 </cmatex>
1946 <*cgdefu>
1947 \ProvidesFile{achemso-cgdefu.cfg}
1948 [2025-09-22 v3.14 achemso configuration: Cryst. Growth Des.]
1949 \def\acs@type@list{%
1950   article,communication,perspective,supinfo%
1951 }
1952 \SectionNumbersOff
1953 \ifx\acs@manuscript\acs@manuscript@communication
1954   \SectionsOff
1955 \fi
1956 \setlength{\acs@tocentry@height}{8.9 cm}
1957 \setlength{\acs@tocentry@width}{4.6 cm}
1958 </cgdefu>
1959 <*enfuem>
1960 \ProvidesFile{achemso-enfuem.cfg}
1961 [2025-09-22 v3.14 achemso configuration: Energy Fuels]
1962 \def\acs@type@list{article,review,supinfo}
1963 \SectionNumbersOff
1964 </enfuem>
1965 <*esthag>
1966 \ProvidesFile{achemso-esthag.cfg}
1967 [2025-09-22 v3.14 achemso configuration: Environ. Sci. Technol.]

```

```

1968 \def\acs@type@list{article,feature,perspective,review,suppinfo}
1969 \SectionNumbersOff
1970 \setkeys{acs}{maxauthors = 0, keywords = true}
1971 \esthag
1972 \*estlcu
1973 \ProvidesFile{achemso-estlcu.cfg}
1974 [2025-09-22 v3.14 achemso configuration: Environ. Sci. Technol. Lett.]
1975 \def\acs@type@list{letter,review,suppinfo}
1976 \SectionNumbersOff
1977 \estlcu
1978 \*iecred
1979 \ProvidesFile{achemso-iecred.cfg}
1980 [2025-09-22 v3.14 achemso configuration: Ind. Eng. Chem. Res.]
1981 \setkeys{acs}{biblabel = brackets}
1982 \SectionNumbersOff
1983 \iecred
1984 \*inoraj
1985 \ProvidesFile{achemso-inoraj.cfg}
1986 [2025-09-22 v3.14 achemso configuration: Inorg. Chem.]
1987 \SectionNumbersOff
1988 \ifx\acs@manuscript\acs@manuscript@communication
1989 \AbstractOff
1990 \SectionsOff
1991 \fi
1992 \setkeys{acs}{doi = true}
1993 \inoraj
1994 \*jaaucr
1995 \ProvidesFile{achemso-jaaucr.cfg}
1996 [2025-09-22 v3.14 achemso configuration: JACS Au]
1997 \def\acs@type@list{spotlight,account,article,communication,letter,perspective,suppinfo}
1998 \jaaucr
1999 \*jafcau
2000 \ProvidesFile{achemso-jafcau.cfg}
2001 [2025-09-22 v3.14 achemso configuration: J. Agric. Food Chem.]
2002 \setkeys{acs}{keywords = true}
2003 \def\acs@type@list{article,suppinfo}
2004 \SectionNumbersOff
2005 \jafcau
2006 \*jceda8
2007 \ProvidesFile{achemso-jceda8.cfg}
2008 [2025-09-22 v3.14 achemso configuration: J. Chem. Ed.]
2009 \setkeys{acs}{keywords = true}
2010 \SectionNumbersOff
2011 \def\acs@type@list{article,suppinfo}
2012 \SectionNumbersOff
2013 \jceda8
2014 \*jceaax
2015 \ProvidesFile{achemso-jceaax.cfg}
2016 [2025-09-22 v3.14 achemso configuration: J. Chem. Eng. Data]
2017 \def\acs@type@list{article,suppinfo}
2018 \def\refname{Literature Cited}
2019 \SectionNumbersOff
2020 \jceaax
2021 \*jcisd8

```

```

2022 \ProvidesFile{achemso-jcis8.cfg}
2023 [2025-09-22 v3.14 achemso configuration: J. Chem. Inf. Model.]
2024 \def\acs@type@list{article,suppinfo}
2025 \SectionNumbersOff
2026 </jcis8>
2027 <*jctcce>
2028 \ProvidesFile{achemso-jctcce.cfg}
2029 [2025-09-22 v3.14 achemso configuration: J. Chem. Theory Comput.]
2030 \def\acs@type@list{article,suppinfo}
2031 \setkeys{acs}{maxauthors = 0}
2032 </jctcce>
2033 <*jmcmar>
2034 \ProvidesFile{achemso-jmcmar.cfg}
2035 [2025-09-22 v3.14 achemso configuration: J. Med. Chem.]
2036 \def\acs@type@list{article,letter,perspective,suppinfo}
2037 \SectionNumbersOff
2038 \setlength{\acs@tocentry@height}{4.45cm}
2039 \setlength{\acs@tocentry@width}{8.25cm}
2040 </jmcmar>
2041 <*jnprdf>
2042 \ProvidesFile{achemso-jnprdf.cfg}
2043 [2025-09-22 v3.14 achemso configuration: J. Nat. Prod.]
2044 \renewcommand*{\abstractname}{ABSTRACT}
2045 \renewcommand*{\acknowledgementname}{ACKNOWLEDGEMENT}
2046 \renewcommand*{\suppinfofname}{ASSOCIATED CONTENT}
2047 \SectionNumbersOff
2048 \renewcommand*{\acs@abstract}{%
2049 \quotation
2050 \textbf{\abstractname :}%
2051 }
2052 \AbstractOn
2053 \ifx\acs@manuscript\acs@manuscript@communication
2054 \AbstractOff
2055 \SectionsOff
2056 \fi
2057 \def\refname{REFERENCES}
2058 \captionsetup{
2059 labelfont = bf,
2060 labelsep = period
2061 }
2062 </jnprdf>
2063 <*joceah>
2064 \ProvidesFile{achemso-joceah.cfg}
2065 [2025-09-22 v3.14 achemso configuration: J. Org. Chem.]
2066 \ifx\acs@manuscript\acs@manuscript@communication
2067 \AbstractOff
2068 \SectionsOff
2069 \fi
2070 \floatstyle{plaintop}
2071 \restylefloat{scheme}
2072 \floatstyle{plain}
2073 \renewcommand*\acs@type@list{article,communication,note,perspective,review,suppinfo}
2074 </joceah>
2075 <*jpcafh>

```

```

2076 \ProvidesFile{achemso-jpcafh.cfg}
2077 [2025-09-22 v3.14 achemso configuration: J. Phys. Chem. A]
2078 \def\acs@type@list{article,supinfo}
2079 \setkeys{acs}{
2080   etalmode      = truncate,
2081   maxauthors    = 10
2082 }
2083 \SectionNumbersOff
2084 \captionsetup[table]{labelfont=bf,textfont=bf}

Title

2085 \g@addto@macro{\maketitle}{\newpage}
2086 </jpcafh>
2087 <*:jpcbfk>
2088 \ProvidesFile{achemso-jpcbfk.cfg}
2089 [2025-09-22 v3.14 achemso configuration: J. Phys. Chem. B]
2090 \def\acs@type@list{article,supinfo}
2091 \setkeys{acs}{
2092   etalmode      = truncate,
2093   maxauthors    = 10
2094 }
2095 \SectionNumbersOff
2096 \captionsetup[table]{labelfont=bf,textfont=bf}
2097 \g@addto@macro{\maketitle}{\newpage}
2098 </jpcbfk>
2099 <*:jpcck>
2100 \ProvidesFile{achemso-jpcck.cfg}
2101 [2025-09-22 v3.14 achemso configuration: J. Phys. Chem. C]
2102 \def\acs@type@list{article,supinfo}
2103 \setkeys{acs}{
2104   etalmode      = truncate,
2105   maxauthors    = 10
2106 }
2107 \SectionNumbersOff
2108 \captionsetup[table]{labelfont=bf,textfont=bf}
2109 \g@addto@macro{\maketitle}{\newpage}
2110 </jpcck>

2111 <*:jpclcd>
2112 \ProvidesFile{achemso-jpclcd.cfg}
2113 [2025-09-22 v3.14 achemso configuration: J. Phys. Chem. Lett.]
2114 \setkeys{acs}{
2115   etalmode      = truncate,
2116   maxauthors    = 10
2117 }
2118 \def\acs@type@default{letter}
2119 \def\acs@type@list{letter}
2120 \SectionNumbersOff
2121 \captionsetup[table]{labelfont=bf,textfont=bf}
2122 \g@addto@macro{\maketitle}{\newpage}
2123 \renewcommand{\acs@tocentry@print}[1]{%
2124   \gdef\acs@tocentry@text{#1}%
2125 }
2126 \renewcommand*{\acs@abstract@extras}{%
2127   \begingroup

```

```

2128 \acs@tocentry@print@aux
2129 \endgroup
2130 \acs@keywords@print
2131 \newpage
2132 }
2133 \setlength\acs@tocentry@height{2in}
2134 \setlength\acs@tocentry@width{2in}
2135 (/jpcld)
2136 (*jprobs)
2137 \ProvidesFile{achemso-jprobs.cfg}
2138 [2025-09-22 v3.14 achemso configuration: J. Proteome Res.]
2139 \setkeys{acs}{keywords = true}
2140 \def\acs@type@list{article,review,supinfo}
2141 \SectionNumbersOff
2142 (/jprobs)

```

The *J. Am. Chem. Soc.* configuration is rather more complicated as there is the need to construct a “galley-like” layout for communications.

```

2143 (*jacsat)
2144 \ProvidesFile{achemso-jacsat.cfg}
2145 [2025-09-22 v3.14 achemso configuration: J. Am. Chem. Soc.]
2146 \SectionNumbersOff
2147 \ifx\acs@manuscript\acs@manuscript@communication\else
2148 \expandafter\endinput
2149 \fi

```

Everything from here onward applies only to communications. Some adjustments are now made using the existing tools.

```

2150 \setkeys{acs}{
2151 email = true,
2152 layout = twocolumn
2153 }
2154 \SectionsOff
2155 \acs@layout@nine

```

`abstract (env.)` The abstract appears at the start of the document, with lines around it.s

```

2156 \renewenvironment{abstract}{%
2157 \hrule
2158 \vspace{2 mm}%
2159 \sffamily
2160 \noindent
2161 \emph{\textbf{Abstract:}}%
2162 }{%
2163 \vspace{2 mm}%
2164 \hrule
2165 \vspace{6 mm}%
2166 }

```

```

\acksize To keep things logical, the size macros are given names related to their function.
\affilsize Some of these are new, some are defined in the class.
\authorsize 2167 \def\affilsize{%
\emailsize 2168 \@setfontsize\affilsize\@ixpt\@xpt
\capsize 2169 }
\refsize 2170 \def\acksize{%
\suppsize
\titlesize

```



```

2171 \@setfontsize\acksize\@ixpt\@xipt
2172 }
2173 \def\authorsize{%
2174   \@setfontsize\authorsize{10.5}{12.5}%
2175 }
2176 \newcommand*\capsize{%
2177   \@setfontsize\capsize\@viiipt\@ixpt
2178 }
2179 \def\emailsize{%
2180   \@setfontsize\emailsize\@viiipt{15}%
2181 }
2182 \newcommand*\refsize{%
2183   \@setfontsize\refsize{7.5}{7.5}%
2184 }
2185 \def\suppsize{%
2186   \@setfontsize\suppsize{8.5}{10.5}%
2187 }
2188 \def\titlesize{%
2189   \@setfontsize\titlesize\@xipt{13}%
2190 }
2191 \let\footnotesize\refsize
2192 \let\captionfont\capsize

```

\emailfont A slight font change.

```

2193 \def\emailfont{\sffamily}

```

\ps@plain The header styles are done the hard way, to keep down the number of packages  
\ps@jacs loaded.

```

2194 \def\ps@plain{%
2195   \let\@mkboth\@gobbletwo
2196   \let\@oddhead\@empty
2197   \def\@oddfont{%
2198     \reset@font
2199     \sffamily
2200     \textbf{\thepage}%
2201     \hfil
2202   }%
2203   \let\@evenhead\@empty
2204   \let\@evenfont\@oddfont
2205 }
2206 \def\ps@acs{%
2207   \def\@oddfont{%
2208     \reset@font
2209     \sffamily
2210     \textbf{\thepage}%
2211     \hfil
2212   }%
2213   \def\@evenfont{%
2214     \reset@font
2215     \hfil
2216     \sffamily
2217     \textbf{\thepage}%
2218   }%
2219   \def\@oddhead{}%

```

```

2220 \let\@evenhead\@oddhead
2221 }
2222 \pagestyle{acs}

```

\acs@space@pre@title Length adjustments for the title.

```

\acs@space@post@title 2223 \setlength\acs@space@pre@title{16mm}
\acs@space@post@author 2224 \setlength\acs@space@post@title{0mm}
\acs@space@post@address 2225 \setlength\acs@space@post@author{0mm}
\acs@space@post@email 2226 \setlength\acs@space@post@address{0mm}
2227 \setlength\acs@space@post@email{-1mm}
2228 \setlength\acs@maketitle@width{152.4mm}

```

\acs@contact@details Contact details are different here.

```

2229 \def\acs@contact@details{%
2230 Received \today; E-mail: \acs@email@list
2231 }

```

\acs@maketitle@extras No keywords or abbreviations for *J. Am. Chem. Soc.*

```

2232 \let\acs@maketitle@extras\relax

```

Getting the floats correct is a difficult task “by hand”; using the caption package makes this a lot easier.

```

2233 \floatstyle{plaintop}
2234 \restylefloat{scheme}
2235 \floatstyle{plain}
2236 \DeclareCaptionLabelSeparator{perquad}{. \quad}
2237 \captionsetup{
2238   singlelinecheck = off,
2239   labelfont       = {bf,it,sf},
2240   textfont        = sf,
2241   labelsep        = perquad
2242 }
2243 \captionsetup[figure]{textfont=rm}

```

\acs@table A patch or \table.

```

\table 2244 \newcommand*\acs@table{}
2245 \let\acs@table\table
2246 \def\table{%
2247   \capsize
2248   \acs@table
2249 }

```

The bibliography has to be adjusted.

```

2250 \AtBeginDocument{%
2251   \def\bibsection{%
2252     \@startsection
2253       {section}
2254       {1}
2255       {\z@}{\z@}{-2.5mm}%
2256       {\normalfont\acksize\bfseries}
2257       {\hrule\nobreak\vspace{1.2mm}\noindent\refname}%
2258   }%
2259   \let\bibfont\refsize

```

```

2260 \setlength{\bibhang}{0.61cm}%
2261 \setlength{\bibsep}{0mm}%
2262 }
2263 </jacsat>
2264 < *langd5>
2265 \ProvidesFile{achemso-langd5.cfg}
2266 [2025-09-22 v3.14 achemso configuration: Langmuir]
2267 \def\acs@type@list{article,letter,supinfo}
2268 \SectionNumbersOff
2269 </langd5>
2270 < *mamobx>
2271 \ProvidesFile{achemso-mamobx.cfg}
2272 [2025-09-22 v3.14 achemso configuration: Macromolecules]
2273 \SectionNumbersOff
2274 \setkeys{acs}{doi = true}
2275 </mamobx>
2276 < *mpohbp>
2277 \ProvidesFile{achemso-mpohbp.cfg}
2278 [2025-09-22 v3.14 achemso configuration: Mol. Pharm.]
2279 \setkeys{acs}{keywords = true}
2280 \def\acs@type@list{article,supinfo}
2281 \SectionNumbersOff
2282 </mpohbp>
2283 < *nalefd>
2284 \ProvidesFile{achemso-nalefd.cfg}
2285 [2025-09-22 v3.14 achemso configuration: Nano Lett.]
2286 \setkeys{acs}{keywords = true}
2287 \def\acs@type@default{letter}
2288 \def\acs@type@list{letter}
2289 \SectionNumbersOff
2290 </nalefd>
2291 < *orlef7>
2292 \ProvidesFile{achemso-orlef7.cfg}
2293 [2025-09-22 v3.14 achemso configuration: Org. Lett.]
2294 \def\acs@type@default{communication}
2295 \def\acs@type@list{communication}
2296 \SectionNumbersOff
2297 \setkeys{acs}{layout = twocolumn}
2298 \RequirePackage{xcolor}
2299 \definecolor{orglett}{RGB}{128,0,0}
2300 </orlef7>
2301 < *oprdfk>
2302 \ProvidesFile{achemso-oprdfk.cfg}
2303 [2025-09-22 v3.14 achemso configuration: Org. Proc. Res. Dev.]
2304 \def\acs@type@list{article,highlight,review,supinfo}
2305 \SectionNumbersOff
2306 </oprdfk>
2307 < *orgnd7>
2308 \ProvidesFile{achemso-orgnd7.cfg}
2309 [2025-09-22 v3.14 achemso configuration: Organometallics]
2310 \SectionNumbersOff
2311 </orgnd7>

```

## 2 Index

Numbers written in *italic* refer to the page where the corresponding entry is described; numbers underlined refer to the code line of the definition; numbers in *roman* refer to the code lines where the entry is used.

| Symbols                  |                        |                                                                                                                                                                                                                                                                      |
|--------------------------|------------------------|----------------------------------------------------------------------------------------------------------------------------------------------------------------------------------------------------------------------------------------------------------------------|
| \!                       | .....                  | 1524                                                                                                                                                                                                                                                                 |
| \#                       | .....                  | 833, 1873                                                                                                                                                                                                                                                            |
| \.                       | .....                  | 1522, 1526                                                                                                                                                                                                                                                           |
| \?                       | .....                  | 1523                                                                                                                                                                                                                                                                 |
| \@Esphack                | .....                  | 1155                                                                                                                                                                                                                                                                 |
| \@abbreviations          | ...                    | ..... <u>546</u> , 557, 559                                                                                                                                                                                                                                          |
| \@address@i              | .....                  | 853                                                                                                                                                                                                                                                                  |
| \@affil@i                | .....                  | 889                                                                                                                                                                                                                                                                  |
| \@afterindentfalse       | .....                  | 1060, 1071                                                                                                                                                                                                                                                           |
| \@afterindenttrue        | .                      | ..... 1059, 1070                                                                                                                                                                                                                                                     |
| \@arabic                 | .....                  | 1382, 1383, 1384                                                                                                                                                                                                                                                     |
| \@auxout                 | .....                  | 284                                                                                                                                                                                                                                                                  |
| \@bsphack                | ....                   | 174, 1145                                                                                                                                                                                                                                                            |
| \@checkend               | .....                  | 1205                                                                                                                                                                                                                                                                 |
| \@citex                  | 223, 224, 1531, 1532   |                                                                                                                                                                                                                                                                      |
| \@currenvir              | 1154, 1186,            | 1191, 1193, 1323                                                                                                                                                                                                                                                     |
| \@dblarg                 | ....                   | 1063, 1064                                                                                                                                                                                                                                                           |
| \@empty                  | .....                  | 332, 557, 564, 658, 675, 694, 962, 965, 971, 985, 1002, 1203, 1370, 1510, 2196, 2203                                                                                                                                                                                 |
| \@esphack                | .....                  | 206, 210                                                                                                                                                                                                                                                             |
| \@evenfoot               | ..                     | 2204, 2213                                                                                                                                                                                                                                                           |
| \@evenhead               | ..                     | 2203, 2220                                                                                                                                                                                                                                                           |
| \@firstofone             | ...                    | 123, 127                                                                                                                                                                                                                                                             |
| \@firstoftwo             | .....                  | 28, 393, 501, 1464                                                                                                                                                                                                                                                   |
| \@floatboxreset          | ...                    | ..... 1041, 1042                                                                                                                                                                                                                                                     |
| \@fnsymbol               | ....                   | 611, 664, 879, 880, 896                                                                                                                                                                                                                                              |
| \@for                    | .....                  | 770, 1285                                                                                                                                                                                                                                                            |
| \@gobble                 | .....                  | 325, 1201                                                                                                                                                                                                                                                            |
| \@gobbletwo              | .....                  | 2195                                                                                                                                                                                                                                                                 |
| \@ifclassloaded          | ....                   | 10                                                                                                                                                                                                                                                                   |
| \@ifpackageloaded        | .                      | ..... 1450, 1544                                                                                                                                                                                                                                                     |
| \@ifstar                 | 1063, 1074, 1078       |                                                                                                                                                                                                                                                                      |
| \@ifundefined            | ..                     | 148, 451                                                                                                                                                                                                                                                             |
| \@ignorefalse            | ....                   | 1157                                                                                                                                                                                                                                                                 |
| \@ixpt                   | ... 1279, 1340,        | 2168, 2171, 2177                                                                                                                                                                                                                                                     |
| \@keywords               | .....                  | <u>546</u> , 564, 566                                                                                                                                                                                                                                                |
| \@listI                  | .....                  | 1343, 1357                                                                                                                                                                                                                                                           |
| \@listi                  | .....                  | 1343, 1357                                                                                                                                                                                                                                                           |
| \@m                      | .....                  | 1063, 1526                                                                                                                                                                                                                                                           |
| \@makeother              | .....                  | 183                                                                                                                                                                                                                                                                  |
| \@maketitle              | .....                  | <u>597</u>                                                                                                                                                                                                                                                           |
| \@maketitle@title@hook   | .....                  | 597, 1881                                                                                                                                                                                                                                                            |
| \@mciteNatbibCiteCmdList | ..                     | 1423, 1424, 1428                                                                                                                                                                                                                                                     |
| \@mciteSubRef            | ....                   | 1431                                                                                                                                                                                                                                                                 |
| \@mcitereflabelprefix    | .....                  | 1431                                                                                                                                                                                                                                                                 |
| \@minus                  | ..                     | 1344, 1346, 1349, 1358, 1360                                                                                                                                                                                                                                         |
| \@mkboth                 | .....                  | 2195                                                                                                                                                                                                                                                                 |
| \@namedef                | .....                  | 144                                                                                                                                                                                                                                                                  |
| \@nameuse                | .....                  | 38, 103, 117, 688, 738, 819, 863, 873, 903, 923, 987, 993                                                                                                                                                                                                            |
| \@ne                     | ... 343, 346, 370,     | 400, 418, 423, 439, 481, 507, 684, 702, 723, 745, 755, 848, 860, 861, 867, 868, 883, 887, 890, 899, 910, 919, 942, 945, 946, 981, 1882, 1884                                                                                                                         |
| \@nil                    | 1464, 1466, 1501, 1514 |                                                                                                                                                                                                                                                                      |
| \@oddfont                | 2197, 2204, 2207       |                                                                                                                                                                                                                                                                      |
| \@oddhead                | 2196, 2219, 2220       |                                                                                                                                                                                                                                                                      |
| \@onelevel@sanitize      | 192                    |                                                                                                                                                                                                                                                                      |
| \@onlypreamble           | ....                   | .. 336, 352, 385, 492, 527, 536, 545, 550, 555, 1092, 1096, 1102, 1108, 1170, 1175                                                                                                                                                                                   |
| \@plus                   | .....                  | 1344, 1345, 1346, 1349, 1358, 1359, 1360                                                                                                                                                                                                                             |
| \@restonecolfalse        | .                      | ..... 1226, 1244                                                                                                                                                                                                                                                     |
| \@restonecoltrue         | ..                     | ..... 1224, 1242                                                                                                                                                                                                                                                     |
| \@roman                  | 344, 347, 371,         | 374, 377, 403, 424, 426, 441, 444, 447, 451, 452, 455, 457, 478, 482, 484, 510, 521, 530, 539, 688, 716, 734, 738, 746, 765, 771, 782, 788, 863, 869, 873, 903, 911, 923, 944, 951, 983, 984, 987, 993                                                               |
| \@secondoftwo            | .....                  | .. 30, 395, 503, 1464                                                                                                                                                                                                                                                |
| \@secpenalty             | ..                     | 1062, 1073                                                                                                                                                                                                                                                           |
| \@sect                   | .....                  | 1063, 1064                                                                                                                                                                                                                                                           |
| \@setfontsize            | .....                  | 1279, 1340, 1353, 1356, 2168, 2171, 2174, 2177, 2180, 2183, 2186, 2189                                                                                                                                                                                               |
| \@ssect                  | .....                  | 1074, 1075                                                                                                                                                                                                                                                           |
| \@startsection           | 1055,                  | 1066, 1090, 1094, 1113, 1256, 2252                                                                                                                                                                                                                                   |
| \@tempa                  | .....                  | 190, 191, 192, 194, 198, 203, 262, 268, 271, 274, 278, 279, 388, 404, 414, 467, 494, 511, 770, 772, 960, 962, 963, 966, 967, 971, 973, 978, 985, 986, 990, 991, 1002, 1003, 1004, 1153, 1154, 1285, 1286, 1322, 1323, 1392, 1393, 1396, 1397, 1410, 1412, 1424, 1425 |

|                                     |                                                                                                                                                                                                                                                                                                                                                                     |                                         |                                                                                                                                                                                              |                                                                                            |
|-------------------------------------|---------------------------------------------------------------------------------------------------------------------------------------------------------------------------------------------------------------------------------------------------------------------------------------------------------------------------------------------------------------------|-----------------------------------------|----------------------------------------------------------------------------------------------------------------------------------------------------------------------------------------------|--------------------------------------------------------------------------------------------|
| <code>\@tempb</code>                | 402, 404, 509,<br>511, 960, 963,<br>965, 967, 1411, 1412                                                                                                                                                                                                                                                                                                            | <code>\abovedisplayskip</code>          | .<br>..... 1344,<br>1347, 1358, 1361                                                                                                                                                         | 418, 425, 439,<br>440, 441, 444,<br>447, 723, 745,<br>789, 840, 848,<br>859, 866, 883, 905 |
| <code>\@tempcnta</code>             | .... 390,<br>400, 403, 407,<br>415, 427, 440,<br>453, 458, 468,<br>472, 479, 496,<br>507, 510, 514,<br>677, 684, 688,<br>697, 703, 710,<br>716, 734, 738,<br>747, 765, 771,<br>782, 788, 857,<br>859, 860, 863,<br>865, 866, 867,<br>869, 873, 881,<br>890, 899, 900,<br>903, 905, 919,<br>920, 930, 942,<br>943, 944, 951,<br>979, 981, 982,<br>983, 984, 987, 993 | <code>\abstract</code>                  | 1132, 1167, 1172                                                                                                                                                                             |                                                                                            |
| <code>\@tempcntb</code>             | . 416, 423,<br>424, 426, 430,<br>469, 882, 910,<br>911, 914, 923,<br>931, 933, 945, 946                                                                                                                                                                                                                                                                             | <code>\abstract(env.)</code>            | ... 2156                                                                                                                                                                                     |                                                                                            |
| <code>\@tempksipa</code>            | .....<br>1058, 1060, 1062,<br>1069, 1071, 1073                                                                                                                                                                                                                                                                                                                      | <code>\abstractname</code>              | .....<br>.. 1623, 2044, 2050                                                                                                                                                                 |                                                                                            |
| <code>\@tempswafalse</code>         | ....<br>.... 389, 495, 1284                                                                                                                                                                                                                                                                                                                                         | <code>\AbstractOff</code>               | .....<br>1166, 1299, 1942,<br>1989, 2054, 2067                                                                                                                                               |                                                                                            |
| <code>\@tempswatru</code>           | ....<br>.... 405, 512, 1287                                                                                                                                                                                                                                                                                                                                         | <code>\AbstractOn</code>                | . 1166, 2052                                                                                                                                                                                 |                                                                                            |
| <code>\@thanks</code>               | ..... 655,<br>658, 661, 662, 675                                                                                                                                                                                                                                                                                                                                    | <code>acknowledgement (env.)</code>     | ..... 1118, 1307                                                                                                                                                                             |                                                                                            |
| <code>\@title</code>                | ..... 329, 613                                                                                                                                                                                                                                                                                                                                                      | <code>\acknowledgementname</code>       | ..... 1119, 1124,<br>1327, 1329, 2045                                                                                                                                                        |                                                                                            |
| <code>\@unusedoptionlist</code>     | 1370                                                                                                                                                                                                                                                                                                                                                                | <code>\acksizes</code>                  | ..... 1325,<br>1335, 2167, 2256                                                                                                                                                              |                                                                                            |
| <code>\@viipt</code>                | 1279, 2177, 2180                                                                                                                                                                                                                                                                                                                                                    | <code>\acs@abbreviations@print</code>   | ..... 556, 1014                                                                                                                                                                              |                                                                                            |
| <code>\@xipt</code>                 | . 1353, 1356, 2189                                                                                                                                                                                                                                                                                                                                                  | <code>\acs@abstract</code>              | .....<br>.. 1131, 1172, 2048                                                                                                                                                                 |                                                                                            |
| <code>\@xipt</code>                 | ..... 1337, 2171                                                                                                                                                                                                                                                                                                                                                    | <code>\acs@abstract@end</code>          | ..... 1131, 1168                                                                                                                                                                             |                                                                                            |
| <code>\@xpt</code>                  | ... 1353, 1356, 2168                                                                                                                                                                                                                                                                                                                                                | <code>\acs@abstract@extras</code>       | ..... 1009, 2126                                                                                                                                                                             |                                                                                            |
| <code>\\</code>                     | ..... 650                                                                                                                                                                                                                                                                                                                                                           | <code>\acs@abstract@iffalse</code>      | ..... 1131                                                                                                                                                                                   |                                                                                            |
| <code>\{</code>                     | ..... 185                                                                                                                                                                                                                                                                                                                                                           | <code>\acs@abstract@print</code>        | 1221                                                                                                                                                                                         |                                                                                            |
| <code>\}</code>                     | ..... 186                                                                                                                                                                                                                                                                                                                                                           | <code>\acs@abstract@start</code>        | ..... 1131, 1167                                                                                                                                                                             |                                                                                            |
| <code>\^</code>                     | ..... 197                                                                                                                                                                                                                                                                                                                                                           | <code>\acs@abstract@text</code>         | ..... 1222, 1236                                                                                                                                                                             |                                                                                            |
| <code>\\</code>                     | ..... 831, 1871                                                                                                                                                                                                                                                                                                                                                     | <code>\acs@activate@biblabel</code>     | ..... 108                                                                                                                                                                                    |                                                                                            |
| A                                   |                                                                                                                                                                                                                                                                                                                                                                     | <code>\acs@address@list</code>          | ..... 631, 839                                                                                                                                                                               |                                                                                            |
| <code>\abbreviations</code>         | .... 546                                                                                                                                                                                                                                                                                                                                                            | <code>\acs@address@list@auxi</code>     | ..... 839                                                                                                                                                                                    |                                                                                            |
| <code>\abovecaptionskip</code>      | 1348                                                                                                                                                                                                                                                                                                                                                                | <code>\acs@address@list@auxii</code>    | ..... 839                                                                                                                                                                                    |                                                                                            |
| <code>\abovedisplayshortskip</code> | ..... 1345, 1359                                                                                                                                                                                                                                                                                                                                                    | <code>\acs@affil@alt@cnt</code>         | ..... 337,<br>481, 482, 485,<br>497, 514, 726,<br>754, 849, 886, 893                                                                                                                         |                                                                                            |
|                                     |                                                                                                                                                                                                                                                                                                                                                                     | <code>\acs@affil@alt@list</code>        | ..... 894, 909                                                                                                                                                                               |                                                                                            |
|                                     |                                                                                                                                                                                                                                                                                                                                                                     | <code>\acs@affil@alt@lista@aux</code>   | ..... 909                                                                                                                                                                                    |                                                                                            |
|                                     |                                                                                                                                                                                                                                                                                                                                                                     | <code>\acs@affil@cnt</code>             | ..... 337, 346,<br>349, 370, 371,<br>374, 377, 407,                                                                                                                                          |                                                                                            |
|                                     |                                                                                                                                                                                                                                                                                                                                                                     | <code>\acs@affil@cnt</code>             | ..... 418, 425, 439,<br>440, 441, 444,<br>447, 723, 745,<br>789, 840, 848,<br>859, 866, 883, 905                                                                                             |                                                                                            |
|                                     |                                                                                                                                                                                                                                                                                                                                                                     | <code>\acs@affil@ifdup</code>           | ..<br>..... 367, 386, 436                                                                                                                                                                    |                                                                                            |
|                                     |                                                                                                                                                                                                                                                                                                                                                                     | <code>\acs@affil@ifdup@aux</code>       | ..... 386, 417, 470                                                                                                                                                                          |                                                                                            |
|                                     |                                                                                                                                                                                                                                                                                                                                                                     | <code>\acs@affil@list</code>            | ... 877                                                                                                                                                                                      |                                                                                            |
|                                     |                                                                                                                                                                                                                                                                                                                                                                     | <code>\acs@affil@list@aux</code>        | 877                                                                                                                                                                                          |                                                                                            |
|                                     |                                                                                                                                                                                                                                                                                                                                                                     | <code>\acs@affil@marker@cnt</code>      | .. 340, 746, 748,<br>751, 755, 756,<br>759, 772, 773,<br>777, 787, 789,<br>790, 794, 858,<br>861, 862, 868,<br>872, 887, 888,<br>889, 900, 901,<br>902, 920, 921, 922                        |                                                                                            |
|                                     |                                                                                                                                                                                                                                                                                                                                                                     | <code>\acs@affil@swap</code>            | 368, 412                                                                                                                                                                                     |                                                                                            |
|                                     |                                                                                                                                                                                                                                                                                                                                                                     | <code>\acs@affil@swap@aux</code>        | 412                                                                                                                                                                                          |                                                                                            |
|                                     |                                                                                                                                                                                                                                                                                                                                                                     | <code>\acs@alsoaffil@find</code>        | 434                                                                                                                                                                                          |                                                                                            |
|                                     |                                                                                                                                                                                                                                                                                                                                                                     | <code>\acs@altaffil@foot@aux</code>     | ..... 912, 918                                                                                                                                                                               |                                                                                            |
|                                     |                                                                                                                                                                                                                                                                                                                                                                     | <code>\acs@altaffil@ifdup</code>        | ..... 477, 493                                                                                                                                                                               |                                                                                            |
|                                     |                                                                                                                                                                                                                                                                                                                                                                     | <code>\acs@altaffil@ifdup@aux</code>    | ..... 493                                                                                                                                                                                    |                                                                                            |
|                                     |                                                                                                                                                                                                                                                                                                                                                                     | <code>\acs@author@affil</code>          | .<br>..... 691, 732                                                                                                                                                                          |                                                                                            |
|                                     |                                                                                                                                                                                                                                                                                                                                                                     | <code>\acs@author@affil@also</code>     | ..... 692, 764                                                                                                                                                                               |                                                                                            |
|                                     |                                                                                                                                                                                                                                                                                                                                                                     | <code>\acs@author@affil@also@aux</code> | ..... 764                                                                                                                                                                                    |                                                                                            |
|                                     |                                                                                                                                                                                                                                                                                                                                                                     | <code>\acs@author@affil@alt</code>      | ..... 693, 781                                                                                                                                                                               |                                                                                            |
|                                     |                                                                                                                                                                                                                                                                                                                                                                     | <code>\acs@author@affil@alt@aux</code>  | ..... 781                                                                                                                                                                                    |                                                                                            |
|                                     |                                                                                                                                                                                                                                                                                                                                                                     | <code>\acs@author@affil@aux</code>      | ..... 732                                                                                                                                                                                    |                                                                                            |
|                                     |                                                                                                                                                                                                                                                                                                                                                                     | <code>\acs@author@cnt</code>            | ...<br>..... 337, 343,<br>344, 348, 366,<br>430, 435, 451,<br>452, 455, 457,<br>475, 478, 484,<br>520, 521, 529,<br>530, 538, 539,<br>599, 678, 697,<br>702, 703, 709,<br>710, 914, 943, 982 |                                                                                            |

|                                                                                        |                                                                                                                             |                                                                                       |
|----------------------------------------------------------------------------------------|-----------------------------------------------------------------------------------------------------------------------------|---------------------------------------------------------------------------------------|
| <code>\acs@author@fnsymbol</code>                                                      | <code>\acs@collect@begins</code>                                                                                            | <code>\acs@layout@shared</code>                                                       |
| ..... <a href="#">611</a> , <a href="#">664</a> ,                                      | .... <a href="#">1178</a> , <a href="#">1189</a> ,                                                                          | .. <a href="#">1307</a> , <a href="#">1394</a> , <a href="#">1398</a>                 |
| <a href="#">722</a> , <a href="#">751</a> , <a href="#">759</a> ,                      | <a href="#">1199</a> , <a href="#">1201</a> , <a href="#">1203</a>                                                          | <code>\acs@layout@ten</code> .. <a href="#">1337</a>                                  |
| <a href="#">777</a> , <a href="#">794</a> , <a href="#">797</a> ,                      | <code>\acs@collect@begins@</code>                                                                                           | <code>\acs@maketitle@extras</code>                                                    |
| <a href="#">862</a> , <a href="#">872</a> , <a href="#">880</a> , <a href="#">1862</a> | ..... <a href="#">1180</a>                                                                                                  | ..... <a href="#">1022</a> , <a href="#">2232</a>                                     |
| <code>\acs@author@fnsymbol@aux</code>                                                  | <code>\acs@collect@body</code> <a href="#">1180</a>                                                                         | <code>\acs@maketitle@extras@hook</code>                                               |
| ..... <a href="#">797</a>                                                              | <code>\acs@collect@content</code>                                                                                           | .. <a href="#">1022</a> , <a href="#">1857</a> , <a href="#">1912</a>                 |
| <code>\acs@author@fnsymbol@loop</code>                                                 | <a href="#">1176</a> , <a href="#">1176</a> , <a href="#">1184</a> ,                                                        | <code>\acs@maketitle@suppinfo</code>                                                  |
| ..... <a href="#">797</a>                                                              | <a href="#">1192</a> , <a href="#">1195</a> , <a href="#">1210</a>                                                          | ..... <a href="#">613</a> , <a href="#">648</a>                                       |
| <code>\acs@author@fnsymbol@loop@aux@Q</code>                                           | <code>\acs@collect@empty@toks</code>                                                                                        | <code>\acs@maketitle@width</code>                                                     |
| ..... <a href="#">797</a>                                                              | ..... <a href="#">1177</a> , <a href="#">1188</a>                                                                           | .... <a href="#">575</a> , <a href="#">606</a> , <a href="#">2228</a>                 |
| <code>\acs@author@fnsymbol@loop@aux@Q</code>                                           | <code>\acs@collect@toks</code>                                                                                              | <code>\acs@manuscript</code> ...                                                      |
| ..... <a href="#">797</a>                                                              | ..... <a href="#">1176</a> , <a href="#">1181</a> , <a href="#">1182</a> ,                                                  | .. <a href="#">80</a> , <a href="#">649</a> , <a href="#">1286</a> ,                  |
| <code>\acs@author@fnsymbol@loop@aux@M</code>                                           | <a href="#">1185</a> , <a href="#">1188</a> , <a href="#">1219</a>                                                          | <a href="#">1292</a> , <a href="#">1295</a> , <a href="#">1372</a> ,                  |
| ..... <a href="#">797</a>                                                              | <code>\acs@contact@details</code>                                                                                           | <a href="#">1375</a> , <a href="#">1379</a> , <a href="#">1809</a> ,                  |
| <code>\acs@author@fnsymbol@loop@aux@Q</code>                                           | .... <a href="#">639</a> , <a href="#">671</a> , <a href="#">2229</a>                                                       | <a href="#">1941</a> , <a href="#">1953</a> , <a href="#">1988</a> ,                  |
| ..... <a href="#">797</a>                                                              | <code>\acs@email@list</code> ...                                                                                            | <a href="#">2053</a> , <a href="#">2066</a> , <a href="#">2147</a>                    |
| <code>\acs@author@fnsymbol@symbol</code>                                               | .... <a href="#">672</a> , <a href="#">926</a> , <a href="#">2230</a>                                                       | <code>\acs@manuscript@communication</code>                                            |
| ..... <a href="#">797</a>                                                              | <code>\acs@email@list@aux</code> <a href="#">926</a>                                                                        | ..... <a href="#">138</a> ,                                                           |
| <code>\acs@author@footnotes</code>                                                     | <code>\acs@email@list@font</code> <a href="#">926</a>                                                                       | <a href="#">1941</a> , <a href="#">1953</a> , <a href="#">1988</a> ,                  |
| .. <a href="#">682</a> , <a href="#">721</a> , <a href="#">749</a> ,                   | <code>\acs@endabstract</code> ..                                                                                            | <a href="#">2053</a> , <a href="#">2066</a> , <a href="#">2147</a>                    |
| <a href="#">750</a> , <a href="#">757</a> , <a href="#">758</a> ,                      | ..... <a href="#">1131</a> , <a href="#">1173</a>                                                                           | <code>\acs@manuscript@letter</code>                                                   |
| <a href="#">774</a> , <a href="#">775</a> , <a href="#">791</a> , <a href="#">792</a>  | <code>\acs@etal@firstonly</code> <a href="#">96</a>                                                                         | ..... <a href="#">138</a> , <a href="#">1809</a>                                      |
| <code>\acs@author@list</code> <a href="#">624</a> , <a href="#">676</a>                | <code>\acs@etal@truncate</code> . <a href="#">96</a>                                                                        | <code>\acs@manuscript@note</code>                                                     |
| <code>\acs@author@list@and</code>                                                      | <code>\acs@etal@truncatefalse</code>                                                                                        | ..... <a href="#">138</a> , <a href="#">1372</a>                                      |
| ..... <a href="#">686</a> , <a href="#">701</a>                                        | ..... <a href="#">106</a>                                                                                                   | <code>\acs@manuscript@review</code>                                                   |
| <code>\acs@author@list@comma</code>                                                    | <code>\acs@etal@truncatetrue</code>                                                                                         | ..... <a href="#">138</a> , <a href="#">1375</a>                                      |
| ..... <a href="#">689</a> , <a href="#">701</a>                                        | ..... <a href="#">107</a>                                                                                                   | <code>\acs@manuscript@suppinfo</code>                                                 |
| <code>\acs@author@list@main</code>                                                     | <code>\acs@floatboxreset</code> <a href="#">1041</a>                                                                        | .... <a href="#">138</a> , <a href="#">649</a> , <a href="#">1379</a>                 |
| ..... <a href="#">679</a> , <a href="#">682</a>                                        | <code>\acs@fnsymbol@org</code> . <a href="#">877</a>                                                                        | <code>\acs@maxauthors</code> . <a href="#">80</a> , <a href="#">278</a>               |
| <code>\acs@author@star</code> <a href="#">690</a> , <a href="#">715</a>                | <code>\acs@footnote@cnt</code> .                                                                                            | <code>\acs@niib@after@text</code>                                                     |
| <code>\acs@author@star@aux</code> <a href="#">715</a>                                  | ..... <a href="#">340</a> , <a href="#">615</a> ,                                                                           | ..... <a href="#">154</a> ,                                                           |
| <code>\acs@autonote</code> .... <a href="#">213</a>                                    | <a href="#">748</a> , <a href="#">756</a> , <a href="#">773</a> ,                                                           | <a href="#">162</a> , <a href="#">172</a> , <a href="#">207</a> , <a href="#">211</a> |
| <code>\acs@bib@file</code> ....                                                        | <a href="#">790</a> , <a href="#">858</a> , <a href="#">888</a> ,                                                           | <code>\acs@niib@create</code> ..                                                      |
| ..... <a href="#">201</a> , <a href="#">247</a> ,                                      | <a href="#">901</a> , <a href="#">921</a> , <a href="#">1882</a> , <a href="#">1884</a>                                     | .... <a href="#">143</a> , <a href="#">313</a> , <a href="#">1451</a>                 |
| <a href="#">260</a> , <a href="#">261</a> , <a href="#">265</a> , <a href="#">288</a>  | <code>\acs@iffalse</code> .... <a href="#">1165</a>                                                                         | <code>\acs@niib@no@write</code>                                                       |
| <code>\acs@bib@message</code> <a href="#">247</a> , <a href="#">261</a>                | <code>\acs@ifundefined</code> ..                                                                                            | ..... <a href="#">178</a> , <a href="#">209</a>                                       |
| <code>\acs@bib@name</code> .. <a href="#">247</a> , <a href="#">260</a>                | ..... <a href="#">24</a> , <a href="#">35</a> ,                                                                             | <code>\acs@niib@text</code> ....                                                      |
| <code>\acs@bib@write</code> .... <a href="#">253</a>                                   | <a href="#">98</a> , <a href="#">112</a> , <a href="#">716</a> , <a href="#">733</a> ,                                      | ..... <a href="#">155</a> , <a href="#">163</a> , <a href="#">173</a>                 |
| <code>\acs@bib@write@aux</code> <a href="#">253</a>                                    | <a href="#">765</a> , <a href="#">782</a> , <a href="#">869</a> ,                                                           | <code>\acs@niib@write</code> <a href="#">176</a> , <a href="#">181</a>                |
| <code>\acs@biblabel@brackets</code>                                                    | <a href="#">911</a> , <a href="#">944</a> , <a href="#">983</a> , <a href="#">984</a>                                       | <code>\acs@niib@write@aux@i</code>                                                    |
| ..... <a href="#">129</a>                                                              | <code>\acs@journal</code> .....                                                                                             | ..... <a href="#">181</a>                                                             |
| <code>\acs@biblabel@fullstop</code>                                                    | .... <a href="#">80</a> , <a href="#">1363</a> , <a href="#">1365</a>                                                       | <code>\acs@niib@write@aux@ii</code>                                                   |
| ..... <a href="#">129</a>                                                              | <code>\acs@keyval@bool</code> ..                                                                                            | ..... <a href="#">181</a>                                                             |
| <code>\acs@biblabel@period</code> <a href="#">129</a>                                  | <a href="#">34</a> , <a href="#">51</a> , <a href="#">54</a> , <a href="#">57</a> , <a href="#">60</a> ,                    | <code>\acs@nmv@activate</code> . <a href="#">213</a>                                  |
| <code>\acs@biblabel@plain</code> <a href="#">129</a>                                   | <a href="#">63</a> , <a href="#">66</a> , <a href="#">69</a> , <a href="#">72</a> , <a href="#">75</a> , <a href="#">78</a> | <code>\acs@number@list</code> <a href="#">673</a> , <a href="#">957</a>               |
| <code>\acs@bibliography</code> .                                                       | <code>\acs@keywords@print</code>                                                                                            | <code>\acs@number@list@aux@i</code>                                                   |
| ..... <a href="#">168</a> , <a href="#">291</a>                                        | ... <a href="#">556</a> , <a href="#">1018</a> , <a href="#">2130</a>                                                       | ..... <a href="#">957</a>                                                             |
| <code>\acs@bibliographystyle</code>                                                    | <code>\acs@killabstract</code> <a href="#">1299</a>                                                                         | <code>\acs@number@list@aux@ii</code>                                                  |
| ..... <a href="#">1441</a>                                                             | <code>\acs@killsecs</code> .... <a href="#">1300</a>                                                                        | ..... <a href="#">957</a>                                                             |
| <code>\acs@bibstyle</code> <a href="#">1434</a> , <a href="#">1445</a>                 | <code>\acs@layout</code> <a href="#">80</a> , <a href="#">1393</a> , <a href="#">1397</a>                                   | <code>\acs@par</code> .... <a href="#">1305</a> , <a href="#">1332</a>                |
| <code>\acs@collect</code> . <a href="#">1180</a> , <a href="#">1276</a>                | <code>\acs@layout@nine</code> ..                                                                                            | <code>\acs@section</code> .....                                                       |
| <code>\acs@collect@aux</code> . <a href="#">1180</a>                                   | ..... <a href="#">1337</a> , <a href="#">2155</a>                                                                           | <a href="#">1048</a> , <a href="#">1104</a> , <a href="#">1119</a> ,                  |

|                                                      |                                                                                                                                                                                                                                                                                                                                                                                                                                                                                                |                                                                                                                                            |
|------------------------------------------------------|------------------------------------------------------------------------------------------------------------------------------------------------------------------------------------------------------------------------------------------------------------------------------------------------------------------------------------------------------------------------------------------------------------------------------------------------------------------------------------------------|--------------------------------------------------------------------------------------------------------------------------------------------|
| 1122, 1127, 1228,<br>1257, 1329, 1933                | \acs@type@default .                                                                                                                                                                                                                                                                                                                                                                                                                                                                            | \and . . . . . 353                                                                                                                         |
| \acs@sections@none                                   | 1281, 1302, 1928,<br>2118, 2287, 2294                                                                                                                                                                                                                                                                                                                                                                                                                                                          | \arabic . . . . . 1381                                                                                                                     |
| ..... 1077,<br>1098, 1099, 1100                      | \acs@type@list . . . .                                                                                                                                                                                                                                                                                                                                                                                                                                                                         | \AtBeginDocument ..                                                                                                                        |
| \acs@sections@none@aux                               | ..... 1281, 1303,<br>1561, 1567, 1573,<br>1579, 1585, 1591,<br>1597, 1603, 1609,<br>1615, 1622, 1628,<br>1634, 1640, 1646,<br>1652, 1658, 1665,<br>1671, 1677, 1689,<br>1695, 1706, 1713,<br>1719, 1725, 1731,<br>1737, 1743, 1750,<br>1758, 1764, 1770,<br>1782, 1797, 1802,<br>1807, 1816, 1828,<br>1840, 1845, 1900,<br>1916, 1929, 1949,<br>1962, 1968, 1975,<br>1997, 2003, 2011,<br>2017, 2024, 2030,<br>2036, 2073, 2078,<br>2090, 2102, 2119,<br>2140, 2267, 2280,<br>2288, 2295, 2304 | ..... 213, 258,<br>291, 297, 328,<br>1047, 1308, 1385,<br>1449, 1555, 2250                                                                 |
| ..... 1077                                           | \acs@validtype ... 1301                                                                                                                                                                                                                                                                                                                                                                                                                                                                        | \AtEndDocument . . . .                                                                                                                     |
| \acs@setkeys . . . . . 1298                          | \acs@warning 5, 22, 36,<br>99, 113, 354, 360,<br>382, 462, 489,<br>524, 533, 542,<br>600, 736, 843,<br>934, 1085, 1141,<br>1291, 1364, 1444                                                                                                                                                                                                                                                                                                                                                    | ... 287, 1236, 1240                                                                                                                        |
| \acs@space@post@address                              | \active . . . . . 1136, 1146                                                                                                                                                                                                                                                                                                                                                                                                                                                                   | \AtEndOfClass . . . . .                                                                                                                    |
| ..... 575, 634, 2223                                 | \addpenalty . 1062, 1073                                                                                                                                                                                                                                                                                                                                                                                                                                                                       | 122, 123, 1125, 1902                                                                                                                       |
| \acs@space@post@author                               | \addvspace .. 1062, 1073                                                                                                                                                                                                                                                                                                                                                                                                                                                                       | \AtEndOfPackage 126, 127                                                                                                                   |
| ..... 575, 627, 2223                                 | \advance 343, 346, 370,<br>400, 418, 423,<br>439, 481, 507,<br>684, 748, 756,<br>773, 789, 790,<br>860, 861, 867,<br>868, 888, 899,<br>901, 910, 919,<br>921, 942, 945, 981                                                                                                                                                                                                                                                                                                                    | \author . . . . . 342                                                                                                                      |
| \acs@space@post@email                                | \affilfont . . . . . 591, 630                                                                                                                                                                                                                                                                                                                                                                                                                                                                  | \authorfont 591, 591, 622                                                                                                                  |
| ..... 575, 642, 2223                                 | \affiliation . . . . . 365                                                                                                                                                                                                                                                                                                                                                                                                                                                                     | \authorsize 587, 621, 2167                                                                                                                 |
| \acs@space@post@title                                | \affilsize 587, 629, 2167                                                                                                                                                                                                                                                                                                                                                                                                                                                                      |                                                                                                                                            |
| ..... 575, 619, 2223                                 | \aftergroup ... 393,<br>395, 1010, 1394, 1398                                                                                                                                                                                                                                                                                                                                                                                                                                                  | <b>B</b>                                                                                                                                   |
| \acs@space@pre@title                                 | \alsoaffiliation .. 434                                                                                                                                                                                                                                                                                                                                                                                                                                                                        | \begin . . . . . 605, 606,<br>607, 1200, 1213,<br>1261, 1264, 1936                                                                         |
| ..... 575, 604, 2223                                 | \altaffiliation ... 474                                                                                                                                                                                                                                                                                                                                                                                                                                                                        | \begingroup . 26, 182,<br>345, 387, 413,<br>466, 476, 660,<br>663, 928, 958,<br>1109, 1112, 1135,<br>1190, 1255, 1391,<br>1461, 1482, 2127 |
| \acs@startsection .                                  |                                                                                                                                                                                                                                                                                                                                                                                                                                                                                                | \belowdisplayshortskip                                                                                                                     |
| ..... 1056, 1094                                     |                                                                                                                                                                                                                                                                                                                                                                                                                                                                                                | ..... 1346, 1360                                                                                                                           |
| \acs@startsection@alt                                |                                                                                                                                                                                                                                                                                                                                                                                                                                                                                                | \belowdisplayskip .                                                                                                                        |
| ..... 1067, 1090                                     |                                                                                                                                                                                                                                                                                                                                                                                                                                                                                                | ..... 1347, 1361                                                                                                                           |
| \acs@startsection@orig                               |                                                                                                                                                                                                                                                                                                                                                                                                                                                                                                | \bfseries . . . . . 594, 2256                                                                                                              |
| .. 1048, 1113, 1256                                  |                                                                                                                                                                                                                                                                                                                                                                                                                                                                                                | \bibfont . . . . . 2259                                                                                                                    |
| \acs@subsection . . . . .                            |                                                                                                                                                                                                                                                                                                                                                                                                                                                                                                | \bibhang . . . . . 2260                                                                                                                    |
| ..... 1048, 1105                                     |                                                                                                                                                                                                                                                                                                                                                                                                                                                                                                | \bibliography . . . . . 291                                                                                                                |
| \acs@subsection                                      |                                                                                                                                                                                                                                                                                                                                                                                                                                                                                                | \bibliographystyle                                                                                                                         |
| ..... 1048, 1106                                     |                                                                                                                                                                                                                                                                                                                                                                                                                                                                                                | .. 1437, 1439, 1441                                                                                                                        |
| \acs@table . . . . . 2244                            |                                                                                                                                                                                                                                                                                                                                                                                                                                                                                                | \bibnote 143, 143, 232, 243                                                                                                                |
| \acs@title@footnote                                  |                                                                                                                                                                                                                                                                                                                                                                                                                                                                                                | \bibnotemark . . . . . 143                                                                                                                 |
| ..... 612, 653                                       |                                                                                                                                                                                                                                                                                                                                                                                                                                                                                                | \bibnotetext . . . . . 143                                                                                                                 |
| \acs@title@footnote@check                            |                                                                                                                                                                                                                                                                                                                                                                                                                                                                                                | \bibnumfmt . . . . . 129,<br>130, 131, 132, 1388                                                                                           |
| ..... 614, 653                                       |                                                                                                                                                                                                                                                                                                                                                                                                                                                                                                | \bibsection . . . . .                                                                                                                      |
| \acs@title@short 329, 572                            |                                                                                                                                                                                                                                                                                                                                                                                                                                                                                                | .. 1124, 1933, 2251                                                                                                                        |
| \acs@title@short@print                               |                                                                                                                                                                                                                                                                                                                                                                                                                                                                                                | \bibsep . . . . . 2261                                                                                                                     |
| ... 556, 1859, 1914                                  |                                                                                                                                                                                                                                                                                                                                                                                                                                                                                                | \bot . . . . . 832, 1872                                                                                                                   |
| \acs@tocentry@height                                 |                                                                                                                                                                                                                                                                                                                                                                                                                                                                                                |                                                                                                                                            |
| ..... 1265,<br>1272, 1274, 1752,<br>1956, 2038, 2133 |                                                                                                                                                                                                                                                                                                                                                                                                                                                                                                | <b>C</b>                                                                                                                                   |
| \acs@tocentry@print                                  |                                                                                                                                                                                                                                                                                                                                                                                                                                                                                                | \c@figure . . . . . 1382                                                                                                                   |
| .. 1238, 1276, 2123                                  |                                                                                                                                                                                                                                                                                                                                                                                                                                                                                                | \c@footnote . . . . . 615                                                                                                                  |
| \acs@tocentry@print@aux                              |                                                                                                                                                                                                                                                                                                                                                                                                                                                                                                | \c@scheme . . . . . 1383                                                                                                                   |
| ..... 1238, 2128                                     |                                                                                                                                                                                                                                                                                                                                                                                                                                                                                                | \c@table . . . . . 1384                                                                                                                    |
| \acs@tocentry@text                                   |                                                                                                                                                                                                                                                                                                                                                                                                                                                                                                | \capsize . . . . . 2167, 2247                                                                                                              |
| ..... 1238, 2124                                     |                                                                                                                                                                                                                                                                                                                                                                                                                                                                                                |                                                                                                                                            |
| \acs@tocentry@width                                  |                                                                                                                                                                                                                                                                                                                                                                                                                                                                                                |                                                                                                                                            |
| ..... 1264,<br>1273, 1275, 1753,<br>1957, 2039, 2134 |                                                                                                                                                                                                                                                                                                                                                                                                                                                                                                |                                                                                                                                            |
| \acs@type@check . . . . .                            |                                                                                                                                                                                                                                                                                                                                                                                                                                                                                                |                                                                                                                                            |
| ..... 1281, 1371                                     |                                                                                                                                                                                                                                                                                                                                                                                                                                                                                                |                                                                                                                                            |

|                                      |                            |                   |                                               |
|--------------------------------------|----------------------------|-------------------|-----------------------------------------------|
| <code>\captionfont</code> . . . . .  | 2192                       | 1561, 1567, 1573, | 725, 753, 805,                                |
| <code>\captionsetup</code> .         | 2058,                      | 1579, 1585, 1591, | 814, 816, 842,                                |
|                                      | 2084, 2096, 2108,          | 1597, 1603, 1609, | 852, 885, 943,                                |
|                                      | 2121, 2237, 2243           | 1615, 1622, 1623, | 964, 965, 971,                                |
| <code>\catcode</code> . . . . .      | 185,                       | 1628, 1634, 1640, | 982, 989, 1002,                               |
|                                      | 186, 197, 1136,            | 1646, 1652, 1658, | 1061, 1072, 1160,                             |
|                                      | 1137, 1138, 1139,          | 1665, 1671, 1677, | 1207, 1214, 1225,                             |
|                                      | 1146, 1147, 1462           | 1689, 1695, 1706, | 1232, 1243, 1249,                             |
| <code>\centering</code> . . . . .    | 1043                       | 1713, 1719, 1725, | 1290, 1328, 1405,                             |
| <code>chart (env.)</code> . . . . .  | <u>1028</u>                | 1731, 1737, 1743, | 1415, 1427, 1438,                             |
| <code>\chartname</code> . . . . .    | <u>1034</u>                | 1750, 1758, 1764, | 1472, 1497, 1514,                             |
| <code>\citation</code> . . . . .     | 285                        | 1770, 1782, 1797, | 1876, 1883, 2147                              |
| <code>\cite</code> . .               | 154, 159, 225,             | 1802, 1807, 1816, | <code>\email</code> . . . . .                 |
|                                      | 226, 237, 238, <u>1529</u> | 1828, 1840, 1845, | <u>519</u>                                    |
| <code>\citenum</code> . . . . .      | 232, 243                   | 1857, 1862, 1881, | <code>\emailfont</code> <u>591, 637, 2193</u> |
| <code>\citenumfont</code> .          | <u>1387, 1402</u>          | 1900, 1912, 1916, | <code>\emailsize</code> <u>587, 636, 2167</u> |
| <code>\ClassWarning</code> . . . . . | 5                          | 1928, 1929, 1933, | <code>\emergencystretch</code> <u>1311</u>    |
| <code>\closeout</code> . . . . .     | 288                        | 1949, 1962, 1968, | <code>\emph</code> . . . . .                  |
| <code>\columnsep</code> . . . . .    | 1319                       | 1975, 1997, 2003, | 1783, 2161                                    |
| <code>\csname</code> . . . . .       |                            | 2011, 2017, 2018, | <code>\end</code> . . . . .                   |
|                                      | 27, 344, 347, 371,         | 2024, 2030, 2036, | 643, 644,                                     |
|                                      | 374, 377, 403,             | 2057, 2078, 2090, | 645, 1148, 1186,                              |
|                                      | 424, 426, 441,             | 2102, 2118, 2119, | 1198, 1200, 1208,                             |
|                                      | 444, 447, 452,             | 2140, 2167, 2170, | 1214, 1266, 1268                              |
|                                      | 455, 457, 478,             | 2173, 2179, 2185, | <code>\endabstract</code> . .                 |
|                                      | 482, 484, 510,             | 2188, 2193, 2194, | <u>1009,</u>                                  |
|                                      | 521, 530, 539,             | 2197, 2206, 2207, | 1134, 1168, 1173                              |
|                                      | 734, 746, 771,             | 2213, 2219, 2229, | <code>\endcsname</code> . . . . .             |
|                                      | 788, 951, 1191, 1193       | 2246, 2251, 2267, | 27, 344, 348, 371,                            |
|                                      |                            | 2280, 2287, 2288, | 374, 377, 403,                                |
|                                      |                            | 2294, 2295, 2304  | 424, 426, 441,                                |
|                                      |                            |                   | 444, 447, 453,                                |
|                                      |                            |                   | 456, 457, 479,                                |
|                                      |                            |                   | 483, 485, 510,                                |
|                                      |                            |                   | 521, 530, 539,                                |
|                                      |                            |                   | 734, 747, 771,                                |
|                                      |                            |                   | 788, 951, 1191, 1193                          |
|                                      |                            |                   | <code>\endgroup</code> 26, 193, 350,          |
|                                      |                            |                   | 397, 420, 471,                                |
|                                      |                            |                   | 487, 666, 668,                                |
|                                      |                            |                   | 939, 975, 1115,                               |
|                                      |                            |                   | 1117, 1155, 1164,                             |
|                                      |                            |                   | 1204, 1269, 1400,                             |
|                                      |                            |                   | 1467, 1489, 2129                              |
|                                      |                            |                   | <code>\endinput</code> . . . . .              |
|                                      |                            |                   | 15, 2148                                      |
|                                      |                            |                   | <code>\ensuremath</code> . .                  |
|                                      |                            |                   | 798, 1863                                     |
|                                      |                            |                   | environments:                                 |
|                                      |                            |                   | abstract . . . . .                            |
|                                      |                            |                   | <u>2156</u>                                   |
|                                      |                            |                   | acknowledgement                               |
|                                      |                            |                   | . . . . .                                     |
|                                      |                            |                   | <u>1118, 1307</u>                             |
|                                      |                            |                   | chart . . . . .                               |
|                                      |                            |                   | <u>1028</u>                                   |
|                                      |                            |                   | graph . . . . .                               |
|                                      |                            |                   | <u>1028</u>                                   |
|                                      |                            |                   | scheme . . . . .                              |
|                                      |                            |                   | <u>1028</u>                                   |
|                                      |                            |                   | suppinfo .                                    |
|                                      |                            |                   | <u>1118, 1307</u>                             |
|                                      |                            |                   | tocentry . . . . .                            |
|                                      |                            |                   | <u>1276</u>                                   |
|                                      |                            |                   | <code>\everypar</code> . . .                  |
|                                      |                            |                   | 1061, 1072                                    |

**D**

|                                            |                     |                                       |
|--------------------------------------------|---------------------|---------------------------------------|
| <code>\dagger</code> . . . . .             | 827, 1865           | <code>\define@key</code> 50, 53, 56,  |
| <code>\ddagger</code> . . . . .            | 828, 1866           | 59, 62, 65, 68, 71,                   |
| <code>\DeclareCaptionLabelSeparator</code> |                     | 74, 77, 84, 87, 90,                   |
| . . . . .                                  | 2236                | 93, 97, 108, 111, 1409                |
| <code>\DeclareRobustCommand</code>         |                     | <code>\definecolor</code> . . . . .   |
| . . . . .                                  | 152, 157, 161       | 2299                                  |
| <code>\def</code> . . .                    | 85, 88, 91, 94,     | <code>\do</code> . . . . .            |
|                                            | 129, 130, 131, 132, | 183, 771, 1285                        |
|                                            | 149, 154, 190, 191, | <code>\document</code> . . . . .      |
|                                            | 194, 214, 293, 342, | 1027                                  |
|                                            | 353, 359, 388,      | <code>\dospecials</code> . . . . .    |
|                                            | 401, 414, 467,      | 184                                   |
|                                            | 494, 508, 597,      | <code>\doublespacing</code> . . . . . |
|                                            | 685, 821, 929,      | 328                                   |
|                                            | 978, 980, 1042,     |                                       |
|                                            | 1126, 1153, 1189,   |                                       |
|                                            | 1198, 1213, 1222,   |                                       |
|                                            | 1302, 1303, 1322,   |                                       |
|                                            | 1338, 1339, 1352,   |                                       |
|                                            | 1381, 1392, 1396,   |                                       |
|                                            | 1407, 1410, 1411,   |                                       |
|                                            | 1431, 1436, 1443,   |                                       |
|                                            | 1478, 1483, 1519,   |                                       |

**E**

|                              |                  |  |
|------------------------------|------------------|--|
| <code>\edef</code> . . . . . | 262, 986,        |  |
|                              | 990, 1184, 1192, |  |
|                              | 1199, 1424, 1428 |  |
| <code>\else</code> . . . . . | 29, 177,         |  |
|                              | 217, 269, 272,   |  |
|                              | 276, 280, 324,   |  |
|                              | 376, 381, 394,   |  |
|                              | 406, 446, 461,   |  |
|                              | 488, 502, 513,   |  |
|                              | 523, 532, 541,   |  |
|                              | 557, 564, 659,   |  |
|                              | 678, 694, 702,   |  |









|                                                                                                                                                                                                                                                                                                                                                                                                                                                    |                                                                                                                                                                                                                                                                                                   |                                                                                |                                                                                                                                                                              |                                          |                           |
|----------------------------------------------------------------------------------------------------------------------------------------------------------------------------------------------------------------------------------------------------------------------------------------------------------------------------------------------------------------------------------------------------------------------------------------------------|---------------------------------------------------------------------------------------------------------------------------------------------------------------------------------------------------------------------------------------------------------------------------------------------------|--------------------------------------------------------------------------------|------------------------------------------------------------------------------------------------------------------------------------------------------------------------------|------------------------------------------|---------------------------|
| <code>\romannumeral</code> . . . . .                                                                                                                                                                                                                                                                                                                                                                                                               | 815                                                                                                                                                                                                                                                                                               | <code>\setlength</code> .                                                      | 576, 578,<br>580, 582, 584,<br>586, 1274, 1275,<br>1319, 1320, 1752,<br>1753, 1956, 1957,<br>2038, 2039, 2133,<br>2134, 2223, 2224,<br>2225, 2226, 2227,<br>2228, 2260, 2261 | <code>\thepage</code> . . . . .          | 1371,<br>2200, 2210, 2217 |
| <b>S</b>                                                                                                                                                                                                                                                                                                                                                                                                                                           |                                                                                                                                                                                                                                                                                                   |                                                                                |                                                                                                                                                                              |                                          |                           |
| <code>\S</code> . . . . .                                                                                                                                                                                                                                                                                                                                                                                                                          | 830, 1867                                                                                                                                                                                                                                                                                         | <code>\sf</code> . . . . .                                                     | 926                                                                                                                                                                          | <code>\thescheme</code> . . . . .        | 1383                      |
| <code>\scheme (env.)</code> . . . . .                                                                                                                                                                                                                                                                                                                                                                                                              | 1028                                                                                                                                                                                                                                                                                              | <code>\sfcode</code> . . . . .                                                 | 1522,<br>1523, 1524, 1526                                                                                                                                                    | <code>\thetable</code> . . . . .         | 1384                      |
| <code>\schemename</code> . . . . .                                                                                                                                                                                                                                                                                                                                                                                                                 | 1034                                                                                                                                                                                                                                                                                              | <code>\sffamily</code> 592, 594, 672,<br>1259, 2159, 2193,<br>2199, 2209, 2216 |                                                                                                                                                                              | <code>\title</code> . . . . .            | 329                       |
| <code>\section</code> . . .                                                                                                                                                                                                                                                                                                                                                                                                                        | 558, 565,<br>571, 1049, 1098, 1104                                                                                                                                                                                                                                                                | <code>\singlespacing</code> 1260, 1308                                         |                                                                                                                                                                              | <code>\titlefont</code> . . . .          | 591, 609                  |
| <code>\SectionNumbersOff</code>                                                                                                                                                                                                                                                                                                                                                                                                                    | 1089, 1672, 1679,<br>1690, 1708, 1765,<br>1784, 1810, 1818,<br>1827, 1846, 1856,<br>1895, 1901, 1919,<br>1940, 1952, 1963,<br>1969, 1976, 1982,<br>1987, 2004, 2010,<br>2012, 2019, 2025,<br>2037, 2047, 2083,<br>2095, 2107, 2120,<br>2141, 2146, 2268,<br>2273, 2281, 2289,<br>2296, 2305, 2310 | <code>\skip@</code> . . . . .                                                  | 1480                                                                                                                                                                         | <code>\titlesize</code> 587, 610, 2167   |                           |
| <code>\SectionNumbersOn</code> .                                                                                                                                                                                                                                                                                                                                                                                                                   | 1089, 1377                                                                                                                                                                                                                                                                                        | <code>\space</code> .                                                          | 203, 263, 268,<br>271, 274, 275,<br>278, 355, 361,<br>687, 704, 967, 1444                                                                                                    | <code>\tocentry (env.)</code> . . .      | 1276                      |
| <code>\SectionsOff</code> . .                                                                                                                                                                                                                                                                                                                                                                                                                      | 1097,<br>1300, 1373, 1720,<br>1745, 1751, 1759,<br>1943, 1954, 1990,<br>2055, 2068, 2154                                                                                                                                                                                                          | <code>\spacefactor</code> . . . . .                                            | 1497                                                                                                                                                                         | <code>\tocentryname</code> 1257, 1277    |                           |
| <code>\SectionsOn</code> . . . . .                                                                                                                                                                                                                                                                                                                                                                                                                 | 1097, 1376, 1902                                                                                                                                                                                                                                                                                  | <code>\stepcounter</code> . . .                                                | 153, 158                                                                                                                                                                     | <code>\tocsize</code> . . . .            | 1258, 1278                |
| <code>\setcitestyle</code> 1413, 1416                                                                                                                                                                                                                                                                                                                                                                                                              |                                                                                                                                                                                                                                                                                                   | <code>\string</code> . . . .                                                   | 202, 203,<br>204, 266, 282,<br>285, 355, 361, 1444                                                                                                                           | <code>\today</code> . . . . .            | 2230                      |
| <code>\setkeys</code> 109, 133, 302,<br>1298, 1380, 1562,<br>1568, 1574, 1580,<br>1586, 1592, 1598,<br>1604, 1610, 1616,<br>1621, 1629, 1635,<br>1641, 1647, 1653,<br>1659, 1664, 1670,<br>1678, 1684, 1696,<br>1707, 1714, 1726,<br>1732, 1738, 1744,<br>1775, 1789, 1808,<br>1817, 1823, 1833,<br>1851, 1891, 1907,<br>1924, 1939, 1970,<br>1981, 1992, 2002,<br>2009, 2031, 2079,<br>2091, 2103, 2114,<br>2139, 2150, 2274,<br>2279, 2286, 2297 |                                                                                                                                                                                                                                                                                                   | <code>\subsection</code> . . . . .                                             |                                                                                                                                                                              | <code>\toks@</code> 661, 665, 1110, 1114 |                           |
|                                                                                                                                                                                                                                                                                                                                                                                                                                                    |                                                                                                                                                                                                                                                                                                   | <code>\subsubsection</code> . . . .                                            | 1051, 1099, 1105                                                                                                                                                             | <code>\tolerance</code> . . . . .        | 1310                      |
|                                                                                                                                                                                                                                                                                                                                                                                                                                                    |                                                                                                                                                                                                                                                                                                   | <code>\suppinfo (env.)</code> 1118, 1307                                       |                                                                                                                                                                              | <code>\triangle</code> . . . .           | 835, 1875                 |
|                                                                                                                                                                                                                                                                                                                                                                                                                                                    |                                                                                                                                                                                                                                                                                                   | <code>\suppinfoname</code> . . . . .                                           | 1122, 1124, 2046                                                                                                                                                             | <code>\tw@</code> . . . . .              | 709                       |
|                                                                                                                                                                                                                                                                                                                                                                                                                                                    |                                                                                                                                                                                                                                                                                                   | <code>\suppsize</code> . . .                                                   | 1335, 2167                                                                                                                                                                   | <code>\twocolumn</code> . . . . .        | 1231, 1248, 1309          |
| <b>T</b>                                                                                                                                                                                                                                                                                                                                                                                                                                           |                                                                                                                                                                                                                                                                                                   |                                                                                |                                                                                                                                                                              |                                          |                           |
| <code>\table</code> . . . . .                                                                                                                                                                                                                                                                                                                                                                                                                      | 2244                                                                                                                                                                                                                                                                                              |                                                                                |                                                                                                                                                                              |                                          |                           |
| <code>\tableofcontents</code> .                                                                                                                                                                                                                                                                                                                                                                                                                    | 1109                                                                                                                                                                                                                                                                                              |                                                                                |                                                                                                                                                                              |                                          |                           |
| <code>\textbf</code> . . . . .                                                                                                                                                                                                                                                                                                                                                                                                                     | 1327, 2050, 2161,<br>2200, 2210, 2217                                                                                                                                                                                                                                                             |                                                                                |                                                                                                                                                                              |                                          |                           |
| <code>\textit</code> . . . .                                                                                                                                                                                                                                                                                                                                                                                                                       | 1407, 1417                                                                                                                                                                                                                                                                                        |                                                                                |                                                                                                                                                                              |                                          |                           |
| <code>\textsuperscript</code> . .                                                                                                                                                                                                                                                                                                                                                                                                                  | 695                                                                                                                                                                                                                                                                                               |                                                                                |                                                                                                                                                                              |                                          |                           |
| <code>\textwidth</code> . . . . .                                                                                                                                                                                                                                                                                                                                                                                                                  | 586                                                                                                                                                                                                                                                                                               |                                                                                |                                                                                                                                                                              |                                          |                           |
| <code>\thanks</code> . . . . .                                                                                                                                                                                                                                                                                                                                                                                                                     | 353                                                                                                                                                                                                                                                                                               |                                                                                |                                                                                                                                                                              |                                          |                           |
| <code>\the</code> . . . . .                                                                                                                                                                                                                                                                                                                                                                                                                        | 150, 166,<br>349, 427, 453,<br>458, 472, 479,<br>485, 665, 1114,<br>1182, 1185, 1219                                                                                                                                                                                                              |                                                                                |                                                                                                                                                                              |                                          |                           |
| <code>\thebibnote</code> . . . . .                                                                                                                                                                                                                                                                                                                                                                                                                 | 143                                                                                                                                                                                                                                                                                               |                                                                                |                                                                                                                                                                              |                                          |                           |
| <code>\thefigure</code> . . . . .                                                                                                                                                                                                                                                                                                                                                                                                                  | 1382                                                                                                                                                                                                                                                                                              |                                                                                |                                                                                                                                                                              |                                          |                           |
| <b>U</b>                                                                                                                                                                                                                                                                                                                                                                                                                                           |                                                                                                                                                                                                                                                                                                   |                                                                                |                                                                                                                                                                              |                                          |                           |
| <code>\unskip</code> . . . . .                                                                                                                                                                                                                                                                                                                                                                                                                     | 1481                                                                                                                                                                                                                                                                                              |                                                                                |                                                                                                                                                                              |                                          |                           |
| <code>\url</code> . . . . .                                                                                                                                                                                                                                                                                                                                                                                                                        | 949                                                                                                                                                                                                                                                                                               |                                                                                |                                                                                                                                                                              |                                          |                           |
| <code>\UrlFont</code> . . . . .                                                                                                                                                                                                                                                                                                                                                                                                                    | 929                                                                                                                                                                                                                                                                                               |                                                                                |                                                                                                                                                                              |                                          |                           |
| <b>V</b>                                                                                                                                                                                                                                                                                                                                                                                                                                           |                                                                                                                                                                                                                                                                                                   |                                                                                |                                                                                                                                                                              |                                          |                           |
| <code>\value</code> . . . . .                                                                                                                                                                                                                                                                                                                                                                                                                      | 150, 166                                                                                                                                                                                                                                                                                          |                                                                                |                                                                                                                                                                              |                                          |                           |
| <code>\vbox</code> . . . . .                                                                                                                                                                                                                                                                                                                                                                                                                       | 1265                                                                                                                                                                                                                                                                                              |                                                                                |                                                                                                                                                                              |                                          |                           |
| <code>\vspace</code> . . . . .                                                                                                                                                                                                                                                                                                                                                                                                                     | 604,<br>619, 627, 634,<br>642, 1326, 2158,<br>2163, 2165, 2257                                                                                                                                                                                                                                    |                                                                                |                                                                                                                                                                              |                                          |                           |
| <b>W</b>                                                                                                                                                                                                                                                                                                                                                                                                                                           |                                                                                                                                                                                                                                                                                                   |                                                                                |                                                                                                                                                                              |                                          |                           |
| <code>\write</code> .                                                                                                                                                                                                                                                                                                                                                                                                                              | 201, 261, 265, 284                                                                                                                                                                                                                                                                                |                                                                                |                                                                                                                                                                              |                                          |                           |
| <b>X</b>                                                                                                                                                                                                                                                                                                                                                                                                                                           |                                                                                                                                                                                                                                                                                                   |                                                                                |                                                                                                                                                                              |                                          |                           |
| <code>\xdef</code> 347, 426, 452, 455,<br>478, 484, 662, 1111                                                                                                                                                                                                                                                                                                                                                                                      |                                                                                                                                                                                                                                                                                                   |                                                                                |                                                                                                                                                                              |                                          |                           |
| <b>Z</b>                                                                                                                                                                                                                                                                                                                                                                                                                                           |                                                                                                                                                                                                                                                                                                   |                                                                                |                                                                                                                                                                              |                                          |                           |
| <code>\z@</code> . . . . .                                                                                                                                                                                                                                                                                                                                                                                                                         | 166, 366,<br>390, 415, 416,<br>435, 468, 469,<br>475, 496, 497,<br>520, 529, 538,<br>599, 677, 678,<br>722, 726, 754,<br>840, 849, 850,<br>857, 865, 881,<br>882, 886, 893,<br>930, 931, 933,<br>979, 1060, 1071,<br>1345, 1359, 2255                                                             |                                                                                |                                                                                                                                                                              |                                          |                           |
